# Supplementary material for: Carbocyclization of unsaturated thioesters under palladium catalysis
Source: Royal Society of Chemistry journal article supplement (doi:10.1039/c3sc50486g), 2013-01-01

## **Carbocyclization of Unsaturated Thioesters Under Palladium Catalysis**

**Supplementary Information**  
(26 pages)

Arun P. Thottumkara, Toshiki Kurokawa, J. Du Bois\*

*Department of Chemistry  
Stanford University  
Stanford, CA 94305-5080*

**General.** All reagents were obtained commercially unless otherwise noted. Copper(I)-thiophene-2-carboxylate (CuTC) was prepared according to the procedure described by Liebeskind.<sup>1</sup> Thioesters were prepared from the corresponding carboxylic acids under standard conditions.<sup>2</sup> Reactions were performed using glassware that was flame-dried under vacuum (~1 Torr). Air- and moisture-sensitive liquids and solutions were transferred via syringe or stainless steel cannula. Organic solutions were concentrated under reduced pressure (~15 Torr) by rotary evaporation. Solvents were purified by passage under 12 psi N<sub>2</sub> through activated alumina columns. Chromatography was performed on Silicycle Silia-P Silica Gel (40-63  $\mu$ m). Compounds purified by chromatography were typically applied to the adsorbent bed using the indicated solvent conditions with a minimum amount of additional benzene as needed for solubility. Thin layer chromatography was performed on Whatman Partisil K6F Silica Gel 60 Å plates (250  $\mu$ m). Visualization of the developed chromatogram was accomplished by fluorescence quenching and by staining with aqueous potassium permanganate.

Nuclear magnetic resonance (NMR) spectra were acquired on a Varian Inova-300 operating at 300 and 75 MHz, a Varian Mercury-400 operating at 400 and 100 MHz, or a Varian Inova-500 operating at 500 and 125 MHz for <sup>1</sup>H and <sup>13</sup>C, respectively, and are referenced internally according to residual solvent signals. Data for <sup>1</sup>H NMR are recorded as follows: chemical shift ( $\delta$ , ppm), multiplicity (s, singlet; d, doublet; t, triplet; q, quartet; quin, quintet; m, multiplet), integration, coupling constant (Hz). Data for <sup>13</sup>C NMR are reported in terms of chemical shift ( $\delta$ , ppm). Infrared spectra were recorded on a Thermo Nicolet IR300 spectrometer as thin films using NaCl salt plates and are reported in frequency of absorption. High-resolution mass spectra were obtained from the Vincent Coates Foundation Mass Spectrometry Laboratory at Stanford University.

**General procedure for substrate preparation.** Ethanethiol (0.45 mL, 6.20 mmol, 5.0 equiv) was added to a solution of carboxylic acid (1.24 mmol), *N*-(3-dimethylaminopropyl)-*N'*-ethylcarbodiimide hydrochloride (284 mg, 1.49 mmol, 1.20 equiv), 4-(dimethylamino)pyridine (15 mg, 0.12 mmol, 10 mol%) in 12.4 mL of CH<sub>2</sub>Cl<sub>2</sub>. The mixture was stirred until the carboxylic acid was completely consumed, as determined by TLC (1–2 h). The reaction was then quenched with 15 mL of saturated aqueous NaHCO<sub>3</sub>. The mixture was transferred to a separatory funnel and the aqueous layer was extracted 3 x 20 mL CH<sub>2</sub>Cl<sub>2</sub>. The combined organic layers were washed with 25 mL of saturated aqueous sodium chloride, dried over MgSO<sub>4</sub>, filtered, and concentrated under reduced pressure. The desired product was isolated following purification by chromatography on silica gel (conditions given below).

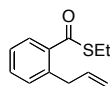

Purified by chromatography on silica gel (9:1 hexanes/EtOAc); yellow oil (80%); TLC *R<sub>f</sub>* = 0.81 (3:1 hexanes/EtOAc); <sup>1</sup>H NMR (CDCl<sub>3</sub>, 500 MHz)  $\delta$  7.73 (dd, 1H, *J* = 8.5, 1.5 Hz), 7.42 (dt, 1H, *J* = 7.5, 1.5 Hz), 7.29–7.25 (m, 2H), 5.97 (ddt, 1H, *J* = 17.0, 10.0, 6.5 Hz), 5.06–4.99 (m, 2H), 3.60 (d, 2H, *J* = 6.5 Hz), 3.03 (q, 2H, *J* = 7.5 Hz), 1.35 (t, 3H, *J* = 7.5 Hz) ppm; <sup>13</sup>C NMR (CDCl<sub>3</sub>, 100 MHz)  $\delta$  194.8, 138.3, 137.9, 137.0, 131.7, 130.8, 128.5, 126.3, 116.0, 37.6, 24.2, 14.8 ppm; IR (thin film)  $\nu$  2973, 2930, 1668, 1638, 1447, 1210, 914 cm<sup>-1</sup>; HRMS (ES+) calcd for C<sub>12</sub>H<sub>15</sub>OS 207.0836 found 207.0838 (M+H<sup>+</sup>).

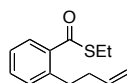

Purified by chromatography on silica gel (9:1 hexanes/EtOAc); yellow oil (91%); TLC *R<sub>f</sub>* = 0.58 (9:1 hexanes/EtOAc); <sup>1</sup>H NMR (CDCl<sub>3</sub>, 400 MHz)  $\delta$  7.71 (dd, 1H, *J* = 8.0, 1.2 Hz), 7.40 (dt, 1H, *J* = 7.6, 1.2 Hz), 7.28–7.22 (m, 2H), 5.85 (ddt, 1H, *J* = 16.8, 10.0, 6.8 Hz), 5.07–4.94 (m, 2H), 3.04 (q, 2H, *J* = 7.2 Hz), 2.90 (t, 2H, *J* = 8.0 Hz), 2.39–2.32 (m, 2H), 1.36 (t, 3H, *J* = 7.2 Hz) ppm; <sup>13</sup>C NMR (CDCl<sub>3</sub>, 100 MHz)  $\delta$  194.9, 140.3, 138.1, 138.0, 131.4, 130.8, 128.5, 126.0, 115.0, 35.6, 33.0, 24.2, 14.8 ppm; IR (thin film)  $\nu$  2970, 2930, 1668, 1641, 1453, 1265, 1207, 909 cm<sup>-1</sup>; HRMS (ES+) calcd for C<sub>13</sub>H<sub>17</sub>OS 221.0992 found 221.0995 (M+H<sup>+</sup>).

- (1) Allred, G. D.; Liebeskind, L. S. *J. Am. Chem. Soc.* **1996**, *118*, 2748–2749.
- (2) Mo, S. J., *et. al.* *J. Am. Chem. Soc.* **2011**, *133*, 976–985.

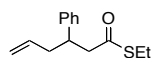

Purified by chromatography on silica gel (9:1 hexanes/EtOAc); yellow oil (87%); TLC  $R_f$  = 0.67 (3:1 hexanes/EtOAc);  $^1\text{H}$  NMR ( $\text{CDCl}_3$ , 400 MHz)  $\delta$  7.31-7.26 (m, 2H), 7.23-7.15 (m, 3H), 5.64 (ddt, 1H,  $J$  = 17.6, 10.4, 7.2 Hz), 5.04-4.94 (m, 2H), 3.28 (tt, 1H,  $J$  = 14.8, 7.2 Hz), 2.90 (dd, 1H,  $J$  = 14.8, 6.8 Hz), 2.84-2.76 (m, 3H), 2.43-2.37 (m, 2H), 1.16 (t, 3H,  $J$  = 7.2 Hz) ppm;  $^{13}\text{C}$  NMR ( $\text{CDCl}_3$ , 100 MHz)  $\delta$  198.4, 143.2, 135.9, 128.5, 127.6, 126.7, 117.1, 49.5, 42.3, 40.4, 23.4, 14.8 ppm; IR (thin film)  $\nu$  2973, 2930, 1688, 1641, 1453, 1265, 1054  $\text{cm}^{-1}$ ; HRMS ( $\text{ES}^+$ ) calcd for  $\text{C}_{14}\text{H}_{19}\text{OS}$  235.1150 found 235.1151 ( $\text{M}+\text{H}^+$ ).

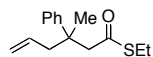

Purified by chromatography on silica gel (99:1 hexanes/EtOAc); yellow oil (94%); TLC  $R_f$  = 0.26 (19:1 hexanes/EtOAc);  $^1\text{H}$  NMR ( $\text{CDCl}_3$ , 400 MHz)  $\delta$  7.33-7.31 (m, 4H), 7.23-7.16 (m, 1H), 5.56-5.45 (m, 1H), 5.05-4.96 (m, 2H), 2.95 (d, 1H,  $J$  = 14.4 Hz), 2.82 (d, 1H,  $J$  = 14.4 Hz), 2.74 (q, 2H,  $J$  = 7.6 Hz), 2.60 (dd, 1H,  $J$  = 14.0, 6.8 Hz), 2.46 (dd, 1H,  $J$  = 14.0, 8.0 Hz), 1.47 (s, 3H), 1.13 (t, 3H,  $J$  = 7.6 Hz) ppm;  $^{13}\text{C}$  NMR ( $\text{CDCl}_3$ , 100 MHz)  $\delta$  197.4, 146.0, 134.4, 128.2, 126.20, 126.16, 118.2, 55.4, 46.9, 41.1, 24.6, 23.5, 14.8 ppm; IR (thin film)  $\nu$  2970, 2930, 1688, 1639, 1604, 1446, 1374, 1012  $\text{cm}^{-1}$ ; HRMS ( $\text{ES}^+$ ) calcd for  $\text{C}_{15}\text{H}_{21}\text{OS}$  249.1307 found 249.1308 ( $\text{M}+\text{H}^+$ ).

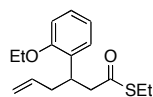

Purified by chromatography on silica gel (49:1 hexanes/EtOAc); yellow oil (90%); TLC  $R_f$  = 0.15 (49:1 hexanes/EtOAc);  $^1\text{H}$  NMR ( $\text{CDCl}_3$ , 400 MHz)  $\delta$  7.16 (dt, 1H,  $J$  = 7.6, 1.6 Hz), 7.09 (dd, 1H,  $J$  = 7.2, 1.6 Hz), 6.87 (dt, 1H,  $J$  = 7.4, 1.2 Hz), 6.83 (dd, 1H,  $J$  = 8.0, 0.8 Hz), 5.66 (ddt, 1H,  $J$  = 17.4, 10.0, 6.4 Hz), 5.03-4.91 (m, 2H), 4.04 (q, 2H,  $J$  = 6.8 Hz), 3.64 (dt, 1H,  $J$  = 14.4, 7.2 Hz), 2.96 (dd, 1H,  $J$  = 15.2, 7.2 Hz), 2.89 (dd, 1H,  $J$  = 15.2, 7.6 Hz), 2.80 (q, 2H,  $J$  = 7.2 Hz), 2.52-2.39 (m, 2H), 1.49 (t, 3H,  $J$  = 6.8 Hz), 1.16 (t, 3H,  $J$  = 7.6 Hz) ppm;  $^{13}\text{C}$  NMR ( $\text{CDCl}_3$ , 100 MHz)  $\delta$  198.8, 156.7, 136.6, 131.0, 128.5, 127.5, 120.3, 116.4, 111.6, 63.6, 48.3, 38.4, 37.0, 23.3, 15.0, 14.8 ppm; IR (thin film)  $\nu$  2978, 2930, 1689, 1494, 146, 1290, 1241, 1125, 1049, 997, 916, 752  $\text{cm}^{-1}$ ; HRMS ( $\text{ES}^+$ ) calcd for  $\text{C}_{16}\text{H}_{23}\text{O}_2\text{S}$  279.1412 found 279.1413 ( $\text{M}+\text{H}^+$ ).

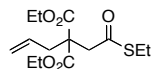

Purified by chromatography on silica gel (19:1 hexanes/EtOAc); yellow oil (21%); TLC  $R_f$  = 0.42 (9:1 hexanes/EtOAc);  $^1\text{H}$  NMR ( $\text{CDCl}_3$ , 400 MHz)  $\delta$  5.72-5.59 (m, 1H), 5.16-5.08 (m, 2H), 4.20 (q, 4H,  $J$  = 6.8 Hz), 3.20 (s, 2H), 2.86 (q, 2H,  $J$  = 7.2 Hz), 2.74 (d, 2H, 7.6 Hz), 1.28-1.20 (m, 9H) ppm;  $^{13}\text{C}$  NMR ( $\text{CDCl}_3$ , 100 MHz)  $\delta$  196.3, 169.9, 132.2, 120.1, 61.9, 55.9, 45.8, 37.4, 23.6, 14.8, 14.1 ppm; IR (thin film)  $\nu$  2982, 1737, 1690, 1287, 1214, 1192  $\text{cm}^{-1}$ ; HRMS ( $\text{ES}^+$ ) calcd for  $\text{C}_{14}\text{H}_{22}\text{O}_5\text{SNa}^+$  325.1079 found 325.1080 ( $\text{MNa}^+$ ).

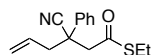

Purified by chromatography on silica gel (19:1 hexanes/EtOAc); yellow oil (17%); TLC  $R_f$  = 0.27 (9:1 hexanes/EtOAc);  $^1\text{H}$  NMR ( $\text{CDCl}_3$ , 400 MHz)  $\delta$  7.47-7.29 (m, 5H), 5.73-5.60 (m, 1H), 5.23-5.16 (m, 2H), 3.23 (d, 1H,  $J$  = 15.6 Hz), 3.17 (d, 1H,  $J$  = 15.6 Hz), 2.86-2.71 (m, 4H), 1.15 (t, 3H,  $J$  = 7.6 Hz) ppm;  $^{13}\text{C}$  NMR ( $\text{CDCl}_3$ , 100 MHz)  $\delta$  194.2, 136.9, 131.1, 129.0, 128.3, 126.1, 121.1, 94.5, 51.4, 44.9, 44.6, 23.4, 14.6 ppm; IR (thin film)  $\nu$  2929, 2359, 1688, 1495, 1449, 1265, 993  $\text{cm}^{-1}$ ; HRMS ( $\text{ES}^+$ ) calcd for  $\text{C}_{15}\text{H}_{18}\text{ONS}$  260.1109 found 260.1104 ( $\text{M}+\text{H}^+$ ).

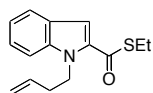

Purified by chromatography on silica gel (19:1 hexanes/EtOAc); yellow oil (12%); TLC  $R_f$  = 0.46 (9:1 hexanes/EtOAc);  $^1\text{H}$  NMR ( $\text{CDCl}_3$ , 400 MHz)  $\delta$  7.68 (d, 1H,  $J$  = 8.0 Hz), 7.45-7.32 (m, 3H), 7.16 (t, 1H,  $J$  = 7.4

Hz), 5.82 (ddt, 1H,  $J = 16.8, 10.4, 6.8$  Hz), 5.11-4.99 (m, 2H), 4.57 (t, 2H,  $J = 6.8$  Hz), 3.07 (q, 2H,  $J = 7.2$  Hz), 2.54 (dt, 2H,  $J = 7.6, 6.8$  Hz), 1.37 (t, 3H,  $J = 6.8$  Hz) ppm;  $^{13}\text{C}$  NMR ( $\text{CDCl}_3$ , 100 MHz)  $\delta$  185.0, 139.2, 134.7, 133.9, 126.1, 125.6, 122.9, 120.9, 117.3, 110.6, 110.5, 44.5, 34.9, 23.4, 15.0 ppm; IR (thin film)  $\nu$  2929, 1649, 1614, 1511, 1461, 1476, 1354, 1154, 1132, 942  $\text{cm}^{-1}$ ; HRMS ( $\text{ES}^+$ ) calcd for  $\text{C}_{15}\text{H}_{18}\text{ONS}$  260.1109 found 260.1104 ( $\text{M}+\text{H}^+$ ).

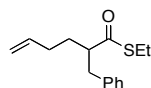

Purified by chromatography on silica gel (9:1 hexanes/EtOAc); yellow oil (86%); TLC  $R_f = 0.86$  (3:1 hexanes/EtOAc);  $^1\text{H}$  NMR ( $\text{CDCl}_3$ , 400 MHz)  $\delta$  7.30-7.12 (m, 5H), 5.73 (ddt, 1H,  $J = 16.8, 10.4, 6.4$  Hz), 5.05-4.94 (m, 2H), 2.98 (dd, 1H,  $J = 13.2, 7.6$  Hz), 2.90-2.77 (m, 3H), 2.72 (dd, 1H,  $J = 13.2, 6.8$  Hz), 2.17-1.97 (m, 2H), 1.87-1.75 (m, 1H), 1.61-1.50 (m, 1H), 1.18 (t, 3H,  $J = 7.2$  Hz) ppm;  $^{13}\text{C}$  NMR ( $\text{CDCl}_3$ , 100 MHz)  $\delta$  202.8, 138.9, 137.7, 129.1, 128.4, 126.4, 115.4, 55.5, 39.0, 31.4, 31.3, 23.2, 14.8 ppm; IR (thin film)  $\nu$  3028, 2929, 2856, 1683, 1641, 1453, 1265, 946, 915  $\text{cm}^{-1}$ ;

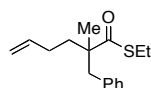

Purified by chromatography on silica gel (19:1 hexanes/EtOAc); yellow oil (53%); TLC  $R_f = 0.49$  (9:1 hexanes/EtOAc);  $^1\text{H}$  NMR ( $\text{CDCl}_3$ , 400 MHz)  $\delta$  7.29-7.20 (m, 3H), 7.15-7.11 (m, 2H), 5.80 (ddt, 1H,  $J = 17.2, 10.0, 6.4$  Hz), 5.07-4.94 (m, 2H), 3.08 (d, 1H,  $J = 13.2$  Hz), 2.88 (q, 2H,  $J = 7.2$  Hz), 2.76 (d, 1H,  $J = 13.6$  Hz), 2.13-1.98 (m, 2H), 1.91 (ddd, 1H,  $J = 13.6, 11.2, 6.8$  Hz), 1.53 (ddd, 1H,  $J = 13.6, 10.8, 6.0$  Hz), 1.26 (t, 3H,  $J = 7.2$  Hz), 1.20 (s, 3H) ppm;  $^{13}\text{C}$  NMR ( $\text{CDCl}_3$ , 100 MHz)  $\delta$  205.8, 128.3, 137.1, 130.5, 128.0, 126.5, 114.7, 53.8, 45.8, 38.9, 28.8, 23.2, 20.6, 14.7 ppm; IR (thin film)  $\nu$  2973, 2930, 1671, 1641, 1454, 954, 913, 704  $\text{cm}^{-1}$ ; HRMS ( $\text{ES}^+$ ) calcd for  $\text{C}_{16}\text{H}_{23}\text{OS}$  263.1469 found 263.1464 ( $\text{M}+\text{H}^+$ ).

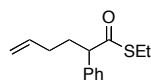

Purified by chromatography on silica gel (3:1 hexanes/EtOAc); clear oil (59%); TLC  $R_f = 0.74$  (3:1 hexanes/EtOAc);  $^1\text{H}$  NMR ( $\text{CDCl}_3$ , 400 MHz)  $\delta$  7.31-7.19 (m, 5H), 5.72 (ddt, 1H,  $J = 16.8, 10.4, 6.4$  Hz), 4.99-4.92 (m, 2H), 3.70 (t, 1H,  $J = 7.2$  Hz), 2.86-2.70 (m, 2H), 2.24-2.14 (m, 1H), 1.96 (m, 2H), 1.91-1.81 (m, 1H), 1.15 (t, 3H,  $J = 7.2$  Hz) ppm;  $^{13}\text{C}$  NMR ( $\text{CDCl}_3$ , 100 MHz)  $\delta$  200.5, 138.4, 137.5, 128.7, 128.3, 127.5, 115.6, 59.5, 32.3, 31.4, 23.6, 14.6 ppm; IR (thin film)  $\nu$  2930, 1686, 1642, 1453, 1265, 996  $\text{cm}^{-1}$ ; HRMS ( $\text{ES}^+$ ) calcd for  $\text{C}_{14}\text{H}_{19}\text{OS}$  235.1156 found 235.1151 ( $\text{M}+\text{H}^+$ ).

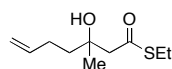

Purified by chromatography on silica gel (19:1 hexanes/EtOAc); yellow oil (25%); TLC  $R_f = 0.56$  (3:1 hexanes/EtOAc);  $^1\text{H}$  NMR ( $\text{CDCl}_3$ , 400 MHz)  $\delta$  5.82 (ddt, 1H,  $J = 16.8, 10.0, 6.8$  Hz), 5.07-5.00 (m, 1H), 4.97-4.92 (m, 1H), 3.35 (s, 1H), 2.91 (q, 2H,  $J = 7.6$  Hz), 2.72 (q, 2H,  $J = 12.4$  Hz), 2.19-2.11 (m, 2H), 1.63-1.56 (m, 2H), 1.27 (t, 3H,  $J = 7.6$  Hz), 1.24 (s, 3H) ppm;  $^{13}\text{C}$  NMR ( $\text{CDCl}_3$ , 100 MHz)  $\delta$  200.5, 138.5, 114.6, 72.2, 53.8, 41.0, 28.3, 26.6, 23.6, 14.7 ppm; IR (thin film)  $\nu$  3519, 2972, 2931, 1671, 1642, 1454, 1377, 1126, 1013, 912  $\text{cm}^{-1}$ .

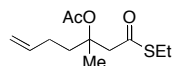

Purified by chromatography on silica gel (9:1 hexanes/EtOAc); yellow oil (83%); TLC  $R_f = 0.81$  (3:1 hexanes/EtOAc);  $^1\text{H}$  NMR ( $\text{CDCl}_3$ , 400 MHz)  $\delta$  5.84-5.71 (m, 1H), 5.06-4.97 (m, 1H), 4.97-4.91 (m, 1H), 3.2 (d, 1H,  $J = 14.0$  Hz), 3.06 (d, 1H,  $J = 14.4$  Hz), 2.84 (q, 2H,  $J = 7.6$  Hz), 2.13-2.04 (m, 3H), 1.99 (s, 3H), 1.85-1.75 (m, 1H), 1.49 (s, 3H), 1.22 (t, 3H,  $J = 7.6$  Hz) ppm;  $^{13}\text{C}$  NMR ( $\text{CDCl}_3$ , 100 MHz)  $\delta$  195.9, 170.6, 137.9, 114.9, 81.6, 50.9, 38.0, 27.9, 24.1, 23.6, 22.4, 14.7 ppm; IR (thin film)  $\nu$  3078, 2977, 2933, 1737, 1689, 1642, 1452, 1368, 1245, 1131, 1016, 913  $\text{cm}^{-1}$ .

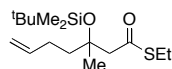

Purified by chromatography on silica gel (gradient elution: 99:1→19:1 hexanes/EtOAc); yellow oil (47%); TLC  $R_f$  = 0.24 (19:1 hexanes/EtOAc);  $^1\text{H}$  NMR ( $\text{CDCl}_3$ , 400 MHz)  $\delta$  5.81 (ddt, 1H,  $J$  = 16.8, 10.4, 6.8 Hz), 5.01 (dq, 1H,  $J$  = 16.8, 1.6 Hz), 4.93 (dq, 1H,  $J$  = 10.0 Hz, 1.2 Hz), 2.84 (q, 2H,  $J$  = 7.6 Hz), 2.70 (s, 2H), 2.24-2.06 (m, 2H), 1.69-1.61 (m, 2H), 1.36 (s, 3H), 1.23 (t, 3H,  $J$  = 7.6 Hz), 0.86 (s, 9H), 0.09 (s, 6H) ppm;  $^{13}\text{C}$  NMR ( $\text{CDCl}_3$ , 100 MHz)  $\delta$  197.0, 138.8, 114.3, 74.9, 55.5, 42.0, 28.6, 28.2, 25.9, 23.6, 18.3, 14.7, -1.9 ppm; IR (thin film)  $\nu$  2931, 2956, 2857, 1691, 1642, 1461, 1377, 1254, 1082, 836  $\text{cm}^{-1}$ .

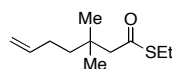

Purified by chromatography on silica gel (9:1 hexanes/EtOAc); yellow oil (82%); TLC  $R_f$  = 0.81 (3:1 hexanes/EtOAc);  $^1\text{H}$  NMR ( $\text{CDCl}_3$ , 400 MHz)  $\delta$  5.78 (ddt, 1H,  $J$  = 16.8, 10.4, 6.8 Hz), 5.03-4.88 (m, 2H), 2.83 (q, 2H,  $J$  = 7.2 Hz), 2.42 (s, 2H), 2.07-1.81 (m, 2H), 1.42-1.36 (m, 2H), 1.22 (t, 3H,  $J$  = 6.8 Hz), 0.99 (s, 6H) ppm;  $^{13}\text{C}$  NMR ( $\text{CDCl}_3$ , 100 MHz)  $\delta$  198.2, 139.1, 114.2, 54.8, 41.4, 34.2, 28.6, 27.4, 23.6, 14.8 ppm; IR (thin film) 2980, 1688, 1641, 1600, 1454, 1012  $\text{cm}^{-1}$ .

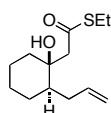

Purified by chromatography on silica gel (19:1 hexanes/EtOAc); yellow oil (29%); TLC  $R_f$  = 0.32 (9:1 hexanes/EtOAc);  $^1\text{H}$  NMR ( $\text{CDCl}_3$ , 400 MHz)  $\delta$  5.81-5.69 (m, 1H), 5.05-4.95 (m, 2H), 2.98-2.92 (m, 2H), 2.88 (q, 2H,  $J$  = 7.6 Hz), 2.63 (d, 1H, 14.8 Hz), 2.40-2.32 (m, 1H), 2.02-1.90 (m, 1H), 1.75-1.53 (m, 4H), 1.50-1.32 (m, 4H), 1.25 (t, 3H, 7.2 Hz) ppm;  $^{13}\text{C}$  NMR ( $\text{CDCl}_3$ , 100 MHz)  $\delta$  200.8, 138.0, 115.9, 73.5, 53.2, 44.5, 36.9, 34.0, 26.8, 25.0, 23.6, 21.7, 14.7 ppm; IR (thin film)  $\nu$  3524, 2932, 2860, 1668, 1446, 1391, 1302, 1078, 1014, 910  $\text{cm}^{-1}$ .

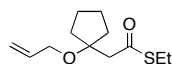

Purified by chromatography on silica gel (9:1 hexanes/EtOAc); yellow oil (31%); TLC  $R_f$  = 0.80 (3:1 hexanes/EtOAc);  $^1\text{H}$  NMR ( $\text{CDCl}_3$ , 400 MHz)  $\delta$  5.96-5.85 (m, 1H), 5.27 (dq, 1H,  $J$  = 17.2, 1.6 Hz), 5.11 (dq, 1H,  $J$  = 10.4, 1.6 Hz), 3.94 (t, 1H,  $J$  = 1.4 Hz), 3.92 (t, 1H,  $J$  = 1.4 Hz), 2.90-2.83 (m, 4H), 1.96-1.55 (m, 8H), 1.24 (t, 3H,  $J$  = 7.6 Hz) ppm;  $^{13}\text{C}$  NMR ( $\text{CDCl}_3$ , 100 MHz)  $\delta$  196.7, 135.5, 116.2, 85.6, 63.9, 50.0, 36.4, 23.7, 23.4, 14.7 ppm; IR (thin film)  $\nu$  2961, 2872, 1690, 1452, 1377, 1254, 1082, 836  $\text{cm}^{-1}$ .

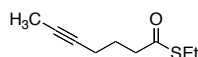

Purified by chromatography on silica gel (9:1 hexanes/EtOAc); yellow oil (67%); TLC  $R_f$  = 0.79 (3:1 hexanes/EtOAc);  $^1\text{H}$  NMR ( $\text{CDCl}_3$ , 400 MHz)  $\delta$  2.87 (dq, 2H,  $J$  = 9.6, 2.0 Hz), 2.65 (dt, 2H, 10.0, 1.6 Hz), 2.23-2.13 (m, 2H), 1.88-1.74 (m, 5H), 1.24 (dt, 3H,  $J$  = 9.6, 1.6 Hz) ppm;  $^{13}\text{C}$  NMR ( $\text{CDCl}_3$ , 75 MHz)  $\delta$  199.2, 77.8, 76.6, 42.9, 24.8, 23.3, 18.1, 14.8, 3.5 ppm; IR (thin film)  $\nu$  2962, 1931, 1689, 1452, 1414, 1266, 1074  $\text{cm}^{-1}$ ; HRMS ( $\text{ES}^+$ ) calcd for  $\text{C}_{15}\text{H}_{18}\text{OS}$  171.0843 found 171.0838 ( $\text{M}+\text{H}^+$ ).

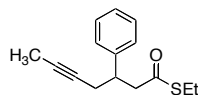

Purified by chromatography on silica gel (7:3 hexanes/ $\text{CH}_2\text{Cl}_2$ ); yellow oil (74%); TLC  $R_f$  = 0.79 (7:3 hexanes/ $\text{CH}_2\text{Cl}_2$ );  $^1\text{H}$  NMR ( $\text{CDCl}_3$ , 400 MHz)  $\delta$  7.33-7.27 (m, 2H), 7.24-7.19 (m, 3H), 3.38 (tt, 1H,  $J$  = 14.0, 6.4 Hz), 3.14 (dd, 1H,  $J$  = 15.2, 6.4 Hz), 2.89 (dd, 1H,  $J$  = 15.2, 8.4 Hz), 2.80 (q, 2H,  $J$  = 7.2 Hz), 2.54-2.37 (m, 2H), 1.76 (t, 3H,  $J$  = 2.6 Hz), 1.16 (t, 3H,  $J$  = 7.2 Hz) ppm;  $^{13}\text{C}$  NMR ( $\text{CDCl}_3$ , 125 MHz)  $\delta$  198.2, 142.7, 128.5, 127.4, 126.9, 78.1, 76.5, 48.9, 41.6, 26.1, 23.4, 14.8, 3.6 ppm; IR (thin film)  $\nu$  2968, 2930, 1688, 1454, 1430, 1265, 1063  $\text{cm}^{-1}$ ; HRMS ( $\text{ES}^+$ ) calcd for  $\text{C}_{15}\text{H}_{19}\text{OS}$  247.1156 found 247.1151 ( $\text{M}+\text{H}^+$ ).

**General procedure for carbocyclization of thioesters.** Thioester (0.20 mmol), Pd(OAc)<sub>2</sub> (2.2 mg, 0.01 mmol, 5 mol%), Cu(thiophene-2-carboxylate) (61.0 mg, 0.32 mmol, 1.6 equiv), and Zn(O<sub>2</sub>CH)<sub>2</sub> (31.1 mg, 0.20 mmol, 1.0 equiv) were added sequentially to a flame-dried 10 mL round bottom flask. The flask was placed under vacuum and back-filled with N<sub>2</sub>. THF (1.7 mL), which had been degassed by a freeze-pump-thaw cycle (3x), was added, followed immediately by P(OMe)<sub>3</sub> (24 µL, 0.20 mmol, 1.0 equiv). The brown suspension was stirred at 60 °C for 18 h, after which time the reaction was quenched with 6 mL of saturated aqueous NaHCO<sub>3</sub>. The mixture was transferred to a separatory funnel and extracted with 3 x 15 mL of EtOAc. The combined organic layers were washed with 1 x 20 mL of saturated aqueous sodium chloride, dried over MgSO<sub>4</sub>, filtered through a pad of Celite, and concentrated under reduced pressure to a brown residue. The desired product was isolated following purification by chromatography on silica gel (conditions given below).

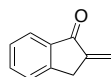

Characterization data matched that reported in literature.<sup>3</sup>

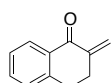

Characterization data matches that reported in literature.<sup>4</sup>

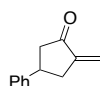

Characterization data matches that reported in literature.<sup>5</sup>

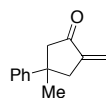

Purified by chromatography on silica gel (19:1 hexanes/EtOAc); yellow oil (83%); TLC  $R_f$  = 0.34 (9:1 hexanes/EtOAc); <sup>1</sup>H NMR (CDCl<sub>3</sub>, 400 MHz) δ 7.39-7.21 (m, 5H), 6.12-6.08 (m, 1H), 5.44-5.39 (m, 1H), 3.05-2.92 (m, 2H), 2.76 (d, 1H,  $J$  = 17.6 Hz), 2.64 (dd, 1H,  $J$  = 17.2, 1.6 Hz), 1.34 (d, 3H,  $J$  = 1.3 Hz) ppm; <sup>13</sup>C NMR (CDCl<sub>3</sub>, 100 MHz) δ 205.4, 148.2, 144.2, 128.7, 126.5, 125.5, 118.4, 52.2, 43.7, 41.1, 30.1 ppm; IR (thin film) ν 2956, 2923, 1729, 1645, 14967, 1445, 1408, 1268 cm<sup>-1</sup>; HRMS (ES<sup>+</sup>) calcd for C<sub>13</sub>H<sub>15</sub>O 187.1123 found 187.1117 (M+H<sup>+</sup>).

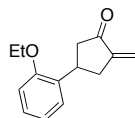

Purified by chromatography on silica gel (99:1 hexanes/EtOAc); yellow oil (80%); TLC  $R_f$  = 0.16 (19:1 hexanes/EtOAc); <sup>1</sup>H NMR (CDCl<sub>3</sub>, 400 MHz) δ 7.25-7.13 (m, 2H), 6.96-6.84 (m, 2H), 6.09-6.02 (m, 1H), 5.39-5.33 (m, 1H), 4.05 (q, 2H,  $J$  = 6.8 Hz), 3.74-3.62 (m, 1H), 3.07 (dd, 1H,  $J$  = 16.2, 7.6 Hz), 2.86-2.79 (m, 1H), 2.76 (dd, 1H,  $J$  = 18.0, 8.0 Hz), 2.59 (dd, 1H,  $J$  = 18.0, 9.6 Hz), 1.41 (t, 3H,  $J$  = 7.2 Hz) ppm; <sup>13</sup>C NMR (CDCl<sub>3</sub>, 100 MHz) δ 206.7, 156.8, 145.2, 131.4, 127.8, 127.0, 120.4, 117.0, 111.4, 63.4, 44.6, 36.1, 34.0, 14.9 ppm; IR (thin film) ν 2979, 1727, 1642, 1494, 1242, 1118, 1046, 752 cm<sup>-1</sup>; HRMS (ES<sup>+</sup>) calcd for C<sub>14</sub>H<sub>17</sub>O<sub>2</sub> 217.1228 found 217.1223 (M+H<sup>+</sup>).

(3) Crich, D.; Chen, C.; Hwang, J-T.; Yuan, H.; Papadatos, A.; Walter, R. I. *J. Am. Chem. Soc.* **1994**, *116*, 8937-8951.

(4) Du, Y.; Lu, X.; Yu, Y. *J. Org. Chem.* **2002**, *67*, 8901-8905.

(5) Barbero, A.; García, C.; Pulido, F. J. *Tetrahedron*, **2000**, *56*, 2739-2751.

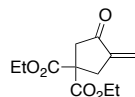

Purified by chromatography on silica gel (9:1 hexanes/EtOAc); yellow oil (89%); TLC  $R_f$  = 0.29 (3:1 hexanes/EtOAc); <sup>1</sup>H NMR (CDCl<sub>3</sub>, 400 MHz)  $\delta$  6.06 (s, 1H), 5.41 (s, 1H), 4.22 (q, 4H,  $J$  = 7.2 Hz), 3.23 (s, 2H), 2.91 (s, 2H), 1.25 (t, 6H,  $J$  = 7.2 Hz) ppm; <sup>13</sup>C NMR (CDCl<sub>3</sub>, 100 MHz)  $\delta$  201.5, 170.7, 141.6, 119.0, 62.2, 54.2, 45.2, 37.0, 14.0 ppm; IR (thin film)  $\nu$  2939, 1733, 1645, 1284, 1246, 1189 cm<sup>-1</sup>; HRMS (ES<sup>+</sup>) calcd for C<sub>12</sub>H<sub>17</sub>O<sub>5</sub> 241.1076 found 241.1071 (M+H<sup>+</sup>).

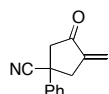

Purified by chromatography on silica gel (9:1 hexanes/EtOAc); yellow oil (94%); TLC  $R_f$  = 0.13 (9:1 hexanes/EtOAc); <sup>1</sup>H NMR (CDCl<sub>3</sub>, 400 MHz)  $\delta$  7.53-7.30 (m, 5H), 6.24 (t, 1H,  $J$  = 2.4 Hz), 5.57 (t, 1H,  $J$  = 2.8 Hz), 3.53 (dt, 1H,  $J$  = 16.0, 2.8 Hz), 3.26-3.15 (m, 2H), 2.98 (d, 1H,  $J$  = 17.6 Hz) ppm; <sup>13</sup>C NMR (CDCl<sub>3</sub>, 100 MHz)  $\delta$  200.0, 140.4, 137.9, 129.5, 129.2, 129.0, 125.7, 125.2, 121.1, 50.1 43.4 ppm; IR (thin film)  $\nu$  2924, 2854, 2238, 1734, 1645, 1496, 1449, 1404, 1266, 1125 cm<sup>-1</sup>; HRMS (ES<sup>+</sup>) calcd for C<sub>13</sub>H<sub>12</sub>ON 217.1228 found 396.1761, dimer of product (M+H<sup>+</sup>).

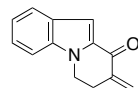

Purified by chromatography on silica gel (9:1 hexanes/EtOAc); off-white foam (30%); TLC  $R_f$  = 0.11 (9:1 hexanes/EtOAc); <sup>1</sup>H NMR (CDCl<sub>3</sub>, 400 MHz)  $\delta$  7.74 (td, 1H,  $J$  = 8.0, 1.2 Hz), 7.42-7.37 (m, 3H), 7.19-7.15 (qd, 1H,  $J$  = 6.0, 2.0 Hz), 6.36-6.35 (m, 1H), 5.58-5.59 (m, 1H), 4.31 (t, 2H,  $J$  = 6.0 Hz), 3.13 (td, 1H,  $J$  = 6.4, 1.2 Hz), 3.11 (td, 1H,  $J$  = 6.4, 1.2 Hz) ppm; <sup>13</sup>C NMR (CDCl<sub>3</sub>, 100 MHz)  $\delta$  180.3, 140.4, 137.6, 134.5, 127.3, 125.9, 123.5, 123.3, 121.3, 110.4, 107.3, 41.3, 31.5 ppm; IR (thin film)  $\nu$  2922, 1671, 1621, 1524, 1477, 1326, 1162 cm<sup>-1</sup>; HRMS (ES<sup>+</sup>) calcd for C<sub>13</sub>H<sub>12</sub>ON 198.0919 found 198.0913 (M+H<sup>+</sup>).

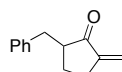

Purified by chromatography on silica gel (49:1 hexanes/EtOAc); yellow oil (50%); TLC  $R_f$  = 0.43 (9:1 hexanes/EtOAc); <sup>1</sup>H NMR (CDCl<sub>3</sub>, 400 MHz)  $\delta$  7.31-7.25 (m, 3H), 7.23-7.16 (m, 2H), 6.05-6.02 (m, 1H), 5.35-5.32 (m, 1H), 3.30-3.21 (m, 1H), 2.62-2.42 (m, 4H), 2.11-2.01 (m, 1H), 1.58-1.47 (m, 1H) ppm; <sup>13</sup>C NMR (100 MHz, CDCl<sub>3</sub>)  $\delta$  207.2, 147.8, 140.0, 129.0, 128.5, 126.3, 117.7, 51.0, 35.9, 27.8, 26.4 ppm; IR (thin film)  $\nu$  2925, 2854, 1725, 1640, 1604, 1495, 1454, 1261, 1065, 941 cm<sup>-1</sup>; HRMS (ES<sup>+</sup>) calcd for C<sub>13</sub>H<sub>15</sub>O 187.1123 found 187.1117 (M+H<sup>+</sup>)..

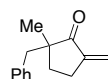

Purified by chromatography on silica gel (99:1 hexanes/EtOAc); yellow oil (33%); TLC  $R_f$  = 0.43 (9:1 hexanes/EtOAc); <sup>1</sup>H NMR (CDCl<sub>3</sub>, 400 MHz)  $\delta$  7.33-7.18 (m, 3H), 7.16-7.07 (m, 2H), 6.08-6.03 (m, 1H), 5.37-5.31 (m, 1H), 2.85 (d, 1H,  $J$  = 13.6 Hz), 2.69 (d, 1H,  $J$  = 13.2 Hz), 2.60-2.39 (m, 2H), 1.64-1.53 (m, 2H), 1.06 (s, 3H) ppm; <sup>13</sup>C NMR (CDCl<sub>3</sub>, 100 MHz)  $\delta$  210.3, 144.5, 137.9, 130.4, 128.2, 126.5, 118.5, 50.1, 42.6, 31.9, 25.8, 22.8 ppm; IR (thin film)  $\nu$  2927, 1723, 1672, 1638, 1454, 1262, 1024 cm<sup>-1</sup>; HRMS (ES<sup>+</sup>) calcd for C<sub>14</sub>H<sub>17</sub>O 201.1279 found 201.1274 (M+H<sup>+</sup>).



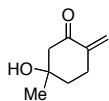

Purified by chromatography on silica gel (9:1 hexanes/EtOAc); yellow oil (73%); TLC  $R_f$  = 0.05 (9:1 hexanes/EtOAc);  $^1\text{H}$  NMR ( $\text{CDCl}_3$ , 400 MHz)  $\delta$  5.94-5.91 (m, 1H), 5.37 (d, 1H,  $J$  = 6.0 Hz), 4.92 (d, 1H,  $J$  = 6.0 Hz), 3.96 (dd, 1H,  $J$  = 11.6, 1.3 Hz), 3.90 (d, 1H,  $J$  = 11.6 Hz), 2.67 (ddd, 1H,  $J$  = 13.6, 4.8, 2.6 Hz), 2.62-2.50 (m, 1H), 2.42 (ddd, 1H,  $J$  = 19.6, 5.2, 2.4 Hz), 2.25-2.14 (m, 1H), 2.04 (s, 3H) ppm;  $^{13}\text{C}$  NMR ( $\text{CDCl}_3$ , 100 MHz)  $\delta$  200.5, 166.7, 125.9, 87.4, 65.9, 60.5, 28.0, 24.6 ppm; IR (thin film)  $\nu$  3179, 2925, 1730, 1638, 1430, 1383, 1310, 1228, 1162, 1113, 1042  $\text{cm}^{-1}$ .

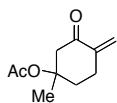

Purified by chromatography on silica gel (9:1 hexanes/EtOAc); yellow oil (37%); TLC  $R_f$  = 0.1 (9:1 hexanes/EtOAc);  $^1\text{H}$  NMR ( $\text{CDCl}_3$ , 400 MHz)  $\delta$  5.42 (d, 1H,  $J$  = 6.2 Hz), 4.94 (d, 1H,  $J$  = 6.2 Hz), 3.98 (dd, 1H,  $J$  = 11.6, 1.3 Hz), 3.92 (d, 1H,  $J$  = 11.6 Hz), 2.71 (ddd, 1H,  $J$  = 13.6, 4.8, 2.6 Hz), 2.71 (s, 3H), 2.62-2.52 (m, 1H), 2.58 (ddd, 1H,  $J$  = 19.6, 5.2, 2.4 Hz), 2.27-2.16 (m, 1H), 2.09 (s, 3H) ppm;  $^{13}\text{C}$  NMR ( $\text{CDCl}_3$ , 100 MHz)  $\delta$  200.6, 166.9, 126.1, 87.4, 65.9, 60.4, 31.1, 28.0, 25.2, 24.7 ppm; IR (thin film)  $\nu$  2972, 2928, 1739, 1733, 1638, 1444, 1380, 1312, 1228, 1170, 1040  $\text{cm}^{-1}$ .

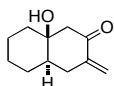

Purified by chromatography on silica gel (19:1 hexanes/EtOAc); yellow oil (81%); TLC  $R_f$  = 0.14 (9:1 hexanes/EtOAc);  $^1\text{H}$  NMR ( $\text{CDCl}_3$ , 400 MHz)  $\delta$  5.89-5.86 (m, 1H), 5.22-5.19 (m, 1H), 3.84-3.76 (m, 2H), 2.81 (dd, 1H,  $J$  = 13.2, 4.0 Hz), 2.52-2.46 (m, 1H), 2.02-1.22 (m, 9H) ppm;  $^{13}\text{C}$  NMR ( $\text{CDCl}_3$ , 100 MHz)  $\delta$  200.4, 168.1, 126.1, 82.4, 60.1, 36.9, 35.6, 33.9, 30.0, 27.2, 25.6 ppm; IR (thin film)  $\nu$  3520, 2928, 2855, 1725, 1640, 1388, 1345, 1289, 1100, 1010, 899  $\text{cm}^{-1}$ .

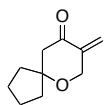

Purified by chromatography on silica gel (9:1 hexanes/EtOAc); yellow oil (61%); TLC  $R_f$  = 0.19 (9:1 hexanes/EtOAc);  $^1\text{H}$  NMR ( $\text{CDCl}_3$ , 400 MHz)  $\delta$  6.06-6.05 (m, 1H), 5.25-5.23 (m, 1H), 4.73 (t, 2H,  $J$  = 1.6 Hz), 2.59 (s, 2H), 1.97-1.44 (m, 8H) ppm;  $^{13}\text{C}$  NMR ( $\text{CDCl}_3$ , 100 MHz)  $\delta$  198.9, 151.3, 126.3, 79.1, 68.9, 60.1, 43.1, 24.7 ppm; IR (thin film)  $\nu$  2901, 1734, 1646, 1604, 1499, 1309, 1159, 1034  $\text{cm}^{-1}$ .

**General procedure for carbocyclization of alkyne-derived thioesters.** Thioester (0.44 mmol),  $\text{Pd}(\text{OAc})_2$  (9.9 mg, 0.04 mmol, 10 mol%),  $\text{Cu}(\text{thiophene-2-carboxylate})$  (269.0 mg, 1.41 mmol, 3.2 equiv), tri(2-furyl)phosphine (20.5 mg, 0.09 mmol, 20 mol%), and phenylboronic acid (86.0 mg, 0.71 mmol, 1.6 equiv) were added sequentially to a flame-dried 10 mL round bottom flask. The flask was placed under vacuum and back-filled with  $\text{N}_2$ . THF (3.7 mL), which had been degassed by a freeze-pump-thaw cycle (3x), was added. The brown suspension was stirred at 60  $^\circ\text{C}$  for 18 h, after which time the reaction was quenched with 10 mL of saturated aqueous  $\text{NaHCO}_3$ . The mixture was transferred to a separatory funnel and extracted with 3 x 15 mL of EtOAc. The combined organic layers were washed with 1 x 20 mL of saturated aqueous sodium chloride, dried over  $\text{MgSO}_4$ , filtered through a pad of Celite, and concentrated under reduced pressure to a brown residue. The desired product was isolated following purification by chromatography on silica gel (conditions given below).



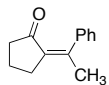

Purified by chromatography on silica gel (9:1 hexanes/EtOAc); yellow oil (56%); TLC  $R_f$  = 0.20 (9:1 hexanes/EtOAc);  $^1\text{H}$  NMR ( $\text{CDCl}_3$ , 400 MHz)  $\delta$  7.37-7.29 (m, 3H), 7.18-7.14 (m, 2H), 2.77 (tq, 2H,  $J$  = 7.2, 1.2 Hz), 2.32 (t, 2H,  $J$  = 8.0 Hz), 2.12 (t, 3H,  $J$  = 1.6 Hz), 1.97 (tt, 2H,  $J$  = 7.6, 7.2 Hz) ppm;  $^{13}\text{C}$  NMR ( $\text{CDCl}_3$ , 100 MHz)  $\delta$  205.0, 146.5, 141.7, 132.2, 127.9, 127.5, 127.3, 40.3, 30.0, 24.9, 19.3 ppm; IR (thin film)  $\nu$  2962, 1772, 1712, 1624, 1440, 1411, 1191, 1125  $\text{cm}^{-1}$ . HRMS ( $\text{ES}^+$ ) calcd for  $\text{C}_{13}\text{H}_{15}\text{O}$  187.1123 found 187.1117 ( $\text{M}+\text{H}^+$ ).

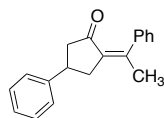

Purified by chromatography on silica gel (gradient elution: 7:3 hexanes/ $\text{CH}_2\text{Cl}_2$ →8:1 hexanes/EtOAc); white solid (67%); TLC  $R_f$  = 0.11 (7:3 hexanes/ $\text{CH}_2\text{Cl}_2$ );  $^1\text{H}$  NMR ( $\text{CDCl}_3$ , 400 MHz)  $\delta$  7.41-7.17 (m, 10H), 3.52-3.40 (m, 1H), 3.26 (dd, 1H,  $J$  = 16.2, 7.8 Hz), 2.86-2.78 (m, 1H), 2.74 (dd, 1H,  $J$  = 17.6, 7.8 Hz), 2.54 (dd, 1H,  $J$  = 17.6, 10.8 Hz), 2.14 (s, 3H);  $^{13}\text{C}$  NMR ( $\text{CDCl}_3$ , 100 MHz)  $\delta$  203.2, 147.2, 144.0, 141.5, 132.2, 128.8, 128.0, 127.7, 127.4, 126.8, 126.8, 47.6, 38.53, 38.46, 24.9 ppm; IR (thin film)  $\nu$  3206, 2891, 1706, 1621, 1596, 1491, 1440, 1193  $\text{cm}^{-1}$ ; HRMS ( $\text{ES}^+$ ) calcd for  $\text{C}_{19}\text{H}_{19}\text{O}$  263.1436 found 263.1430 ( $\text{M}+\text{H}^+$ ).

Archive directory:  
/export/home/arun/vnmrsys/data  
Sample directory:  
  
File: benz\_fused\_substrate\_for\_charac  
  
Pulse Sequence: s2pul  
Solvent: CDCl3

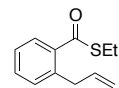

Relax. delay 3.000 sec  
Pulse 52.1 degrees  
Acq. time 4.002 sec  
Width 4997.5 Hz  
16 repetitions  
OBSERVE H1, 400.1115375 MHz  
DATA PROCESSING  
FT size 65536  
Total time 1 min

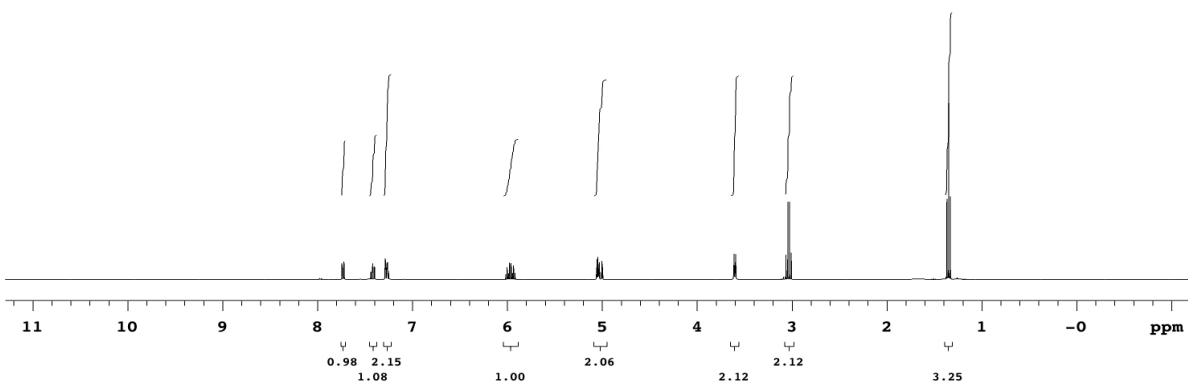

Archive directory:  
/export/home/arun/vnmrsys/data  
Sample directory:

Pulse Sequence: s2pul  
Solvent: CDCl3

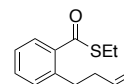

Relax. delay 3.000 sec  
Pulse 52.1 degrees  
Acq. time 4.002 sec  
Width 4997.5 Hz  
16 repetitions  
OBSERVE H1, 400.1115375 MHz  
DATA PROCESSING  
FT size 65536  
Total time 1 min

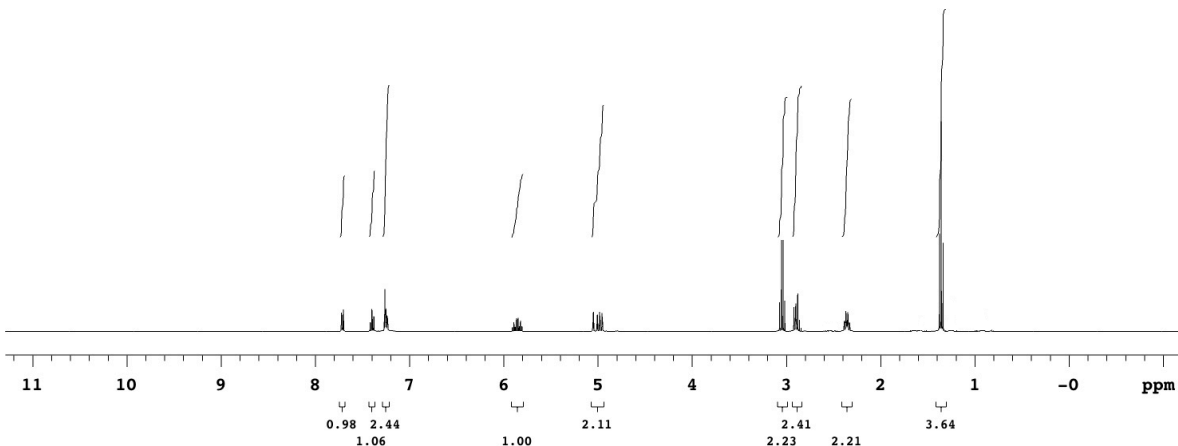

STANDARD 1H OBSERVE

Archive directory:  
/export/home/arun/vnmrsys/data  
Sample directory:

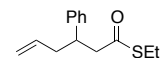

Pulse Sequence: s2pul  
Solvent: CDCl3  
  
Relax. delay 0.500 sec  
Pulse 59.0 degrees  
Acq. time 4.002 sec  
Width 4997.5 Hz  
16 repetitions  
OBSERVE H1, 400.1115367 MHz  
DATA PROCESSING  
FT size 65536  
Total time 1 min

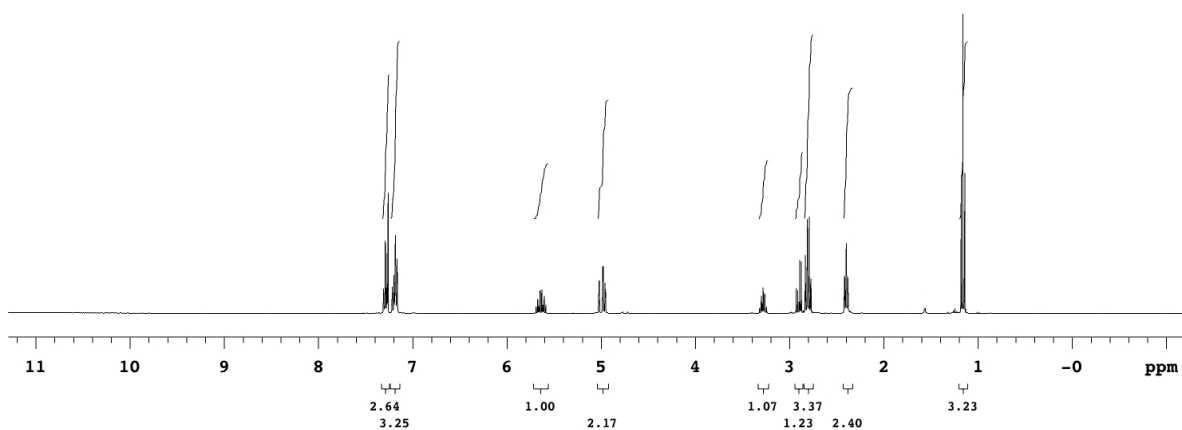

Archive directory:  
/export/home/arun/vnmrsys/data  
Sample directory:

File: apt3-133-fracl0-forcharac

Pulse Sequence: s2pul  
Solvent: CDCl3

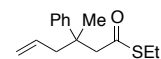

Relax. delay 3.000 sec  
Pulse 52.1 degrees  
Acq. time 4.002 sec  
Width 4997.5 Hz  
64 repetitions  
OBSERVE H1, 400.1115580 MHz  
DATA PROCESSING  
FT size 65536  
Total time 7 min

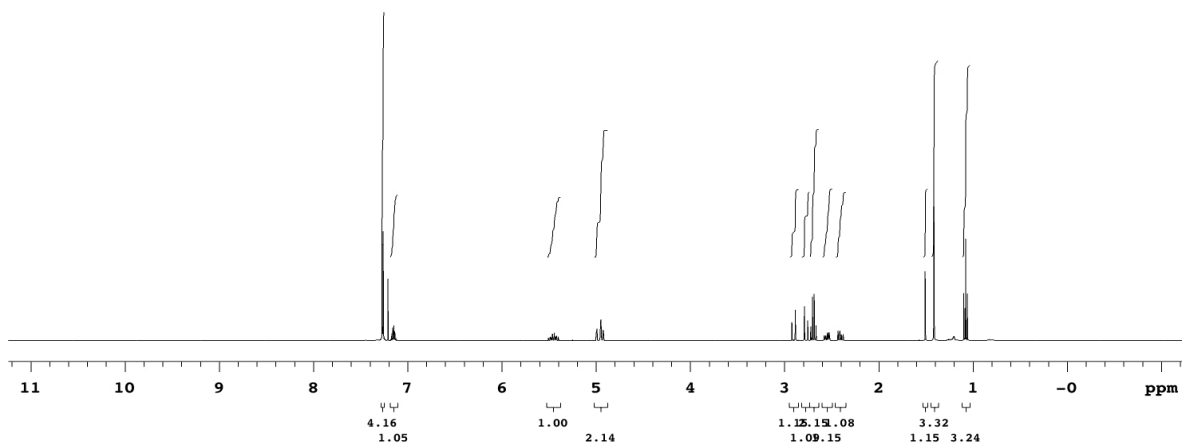

Archive directory:  
/export/home/arun/vnmrsys/data  
Sample directory:

Pulse Sequence: s2pul  
Solvent: CDCl<sub>3</sub>

Relax. delay 3.000 sec  
Pulse 52.1 degrees  
Acq. time 4.002 sec  
Width 4997.5 Hz  
16 repetitions  
OBSERVE H1, 400.1115369 MHz  
DATA PROCESSING  
FT size 65536  
Total time 1 min

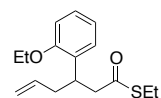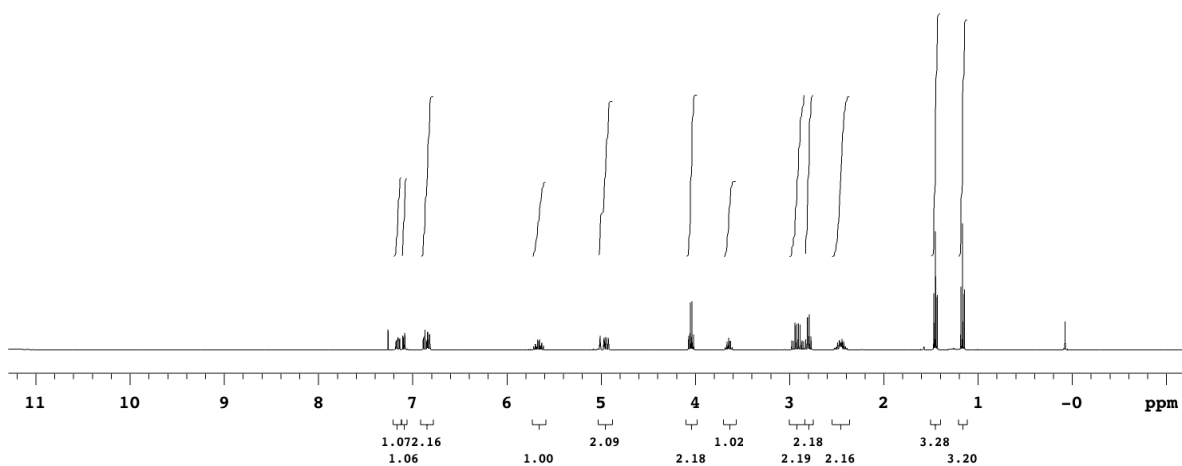

Sample directory:

Pulse Sequence: s2pul  
Solvent: cdcl<sub>3</sub>  
Temp. 23.0 C / 296.1 K

Relax. delay 3.000 sec  
Pulse 45.0 degrees  
Acq. time 4.000 sec  
Width 5605.4 Hz  
16 repetitions  
OBSERVE H1, 399.7345518 MHz  
DATA PROCESSING  
FT size 65536  
Total time 1 min

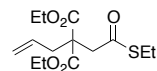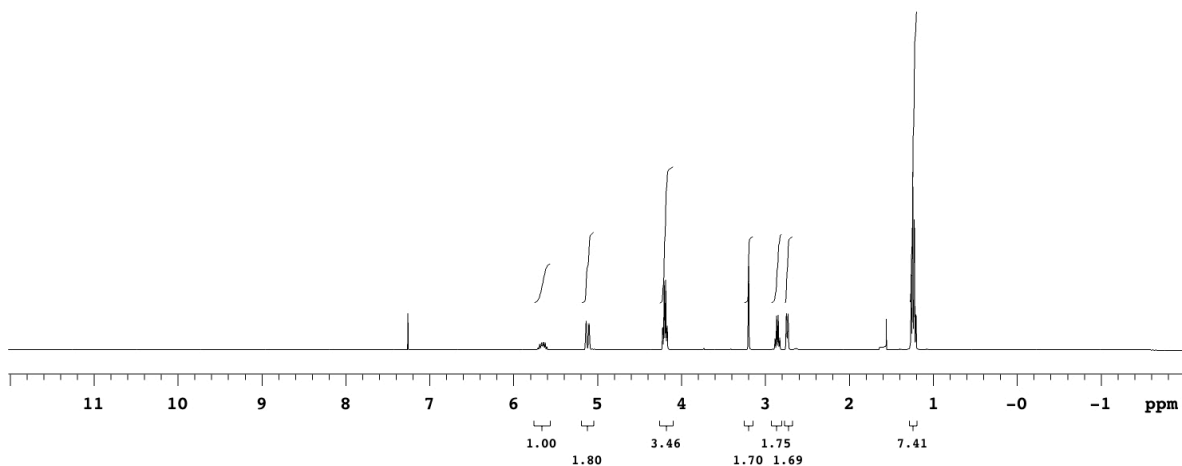

Archive directory:  
/export/home/arun/vnmrsys/data  
Sample directory:

Pulse Sequence: s2pul  
Solvent: CDCl<sub>3</sub>

Relax. delay 3.000 sec  
Pulse 52.1 degrees  
Acq. time 4.002 sec  
Width 4997.5 Hz  
16 repetitions  
OBSERVE H1, 400.1115366 MHz  
DATA PROCESSING  
FT size 65536  
Total time 1 min

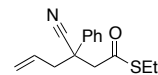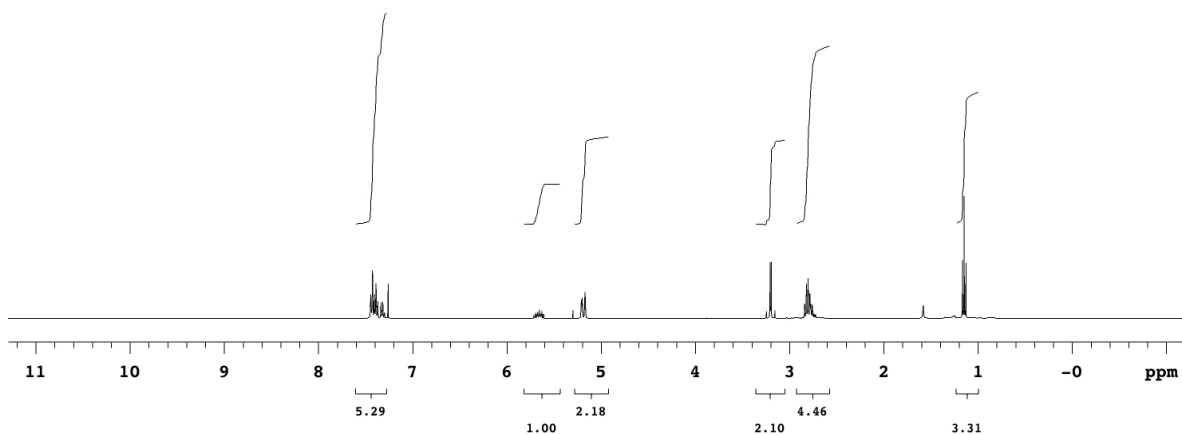

Archive directory:  
/export/home/arun/vnmrsys/data  
Sample directory:

Pulse Sequence: s2pul  
Solvent: CDCl<sub>3</sub>

Relax. delay 3.000 sec  
Pulse 52.1 degrees  
Acq. time 4.002 sec  
Width 4997.5 Hz  
16 repetitions  
OBSERVE H1, 400.1115369 MHz  
DATA PROCESSING  
FT size 65536  
Total time 1 min

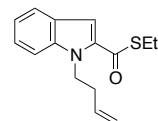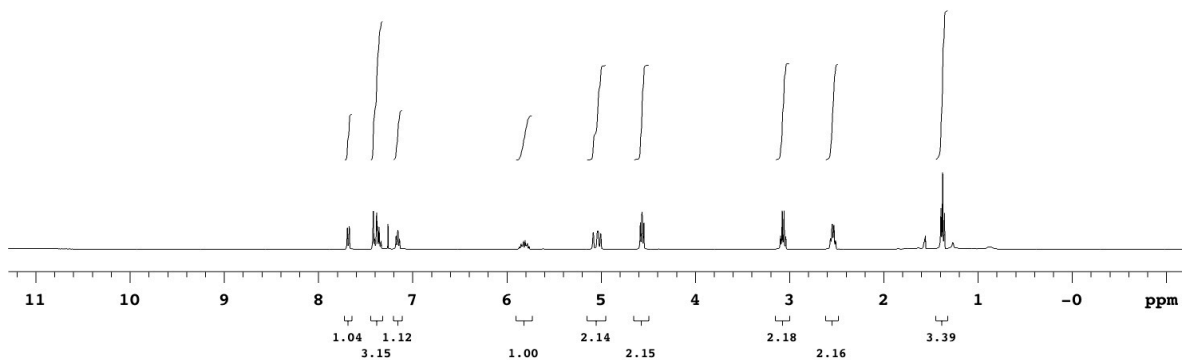

Archive directory:

Sample directory:

Pulse Sequence: s2pul  
Solvent: cdcl3  
Temp. 22.0 C / 295.1 K  
  
Relax. delay 3.000 sec  
Pulse 45.0 degrees  
Acq. time 4.000 sec  
Width 5605.4 Hz  
16 repetitions  
OBSERVE H1, 399.7291453 MHz  
DATA PROCESSING  
FT size 65536  
Total time 1 min

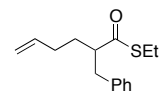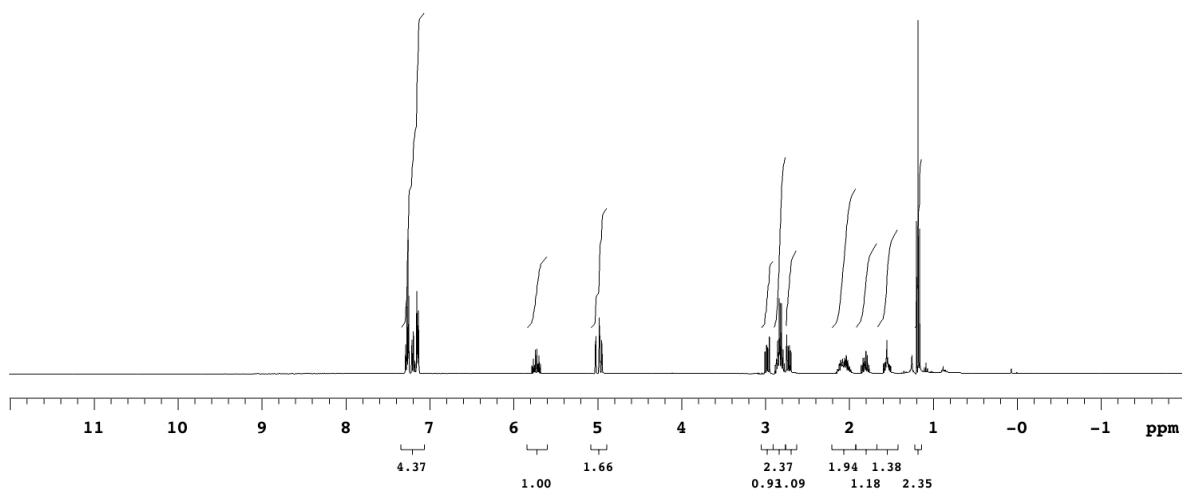

Sample directory:

Pulse Sequence: s2pul  
Solvent: cdcl3  
Temp. 23.0 C / 296.1 K  
  
Relax. delay 3.000 sec  
Pulse 45.0 degrees  
Acq. time 4.000 sec  
Width 5605.4 Hz  
16 repetitions  
OBSERVE H1, 399.7345483 MHz  
DATA PROCESSING  
FT size 65536  
Total time 1 min

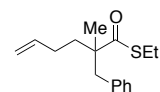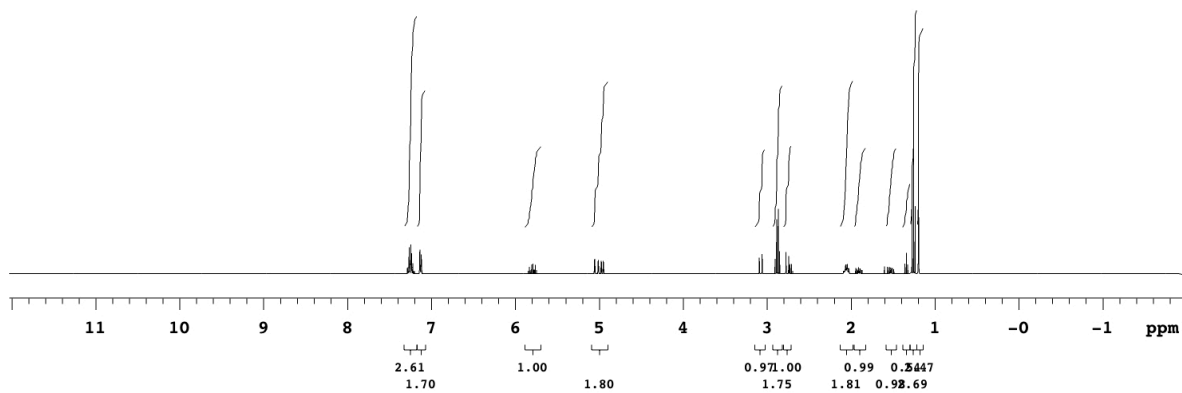

Archive directory:  
/export/home/arun/vnmrsys/data  
Sample directory:

Pulse Sequence: s2pul  
Solvent: CDCl3

Relax. delay 3.000 sec  
Pulse 52.1 degrees  
Acq. time 4.002 sec  
Width 4997.5 Hz  
16 repetitions  
OBSERVE H1, 400.1115613 MHz  
DATA PROCESSING  
FT size 65536  
Total time 1 min

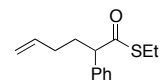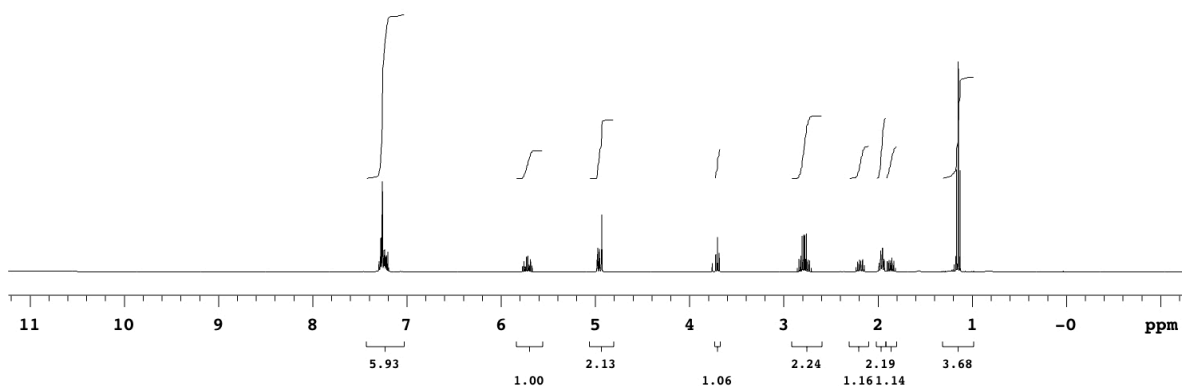

Sample directory:

Pulse Sequence: s2pul  
Solvent: cdcl3  
Temp. 20.0 C / 293.1 K

Relax. delay 3.000 sec  
Pulse 45.0 degrees  
Acq. time 4.000 sec  
Width 5605.4 Hz  
16 repetitions  
OBSERVE H1, 399.7345501 MHz  
DATA PROCESSING  
FT size 65536  
Total time 1 min

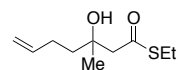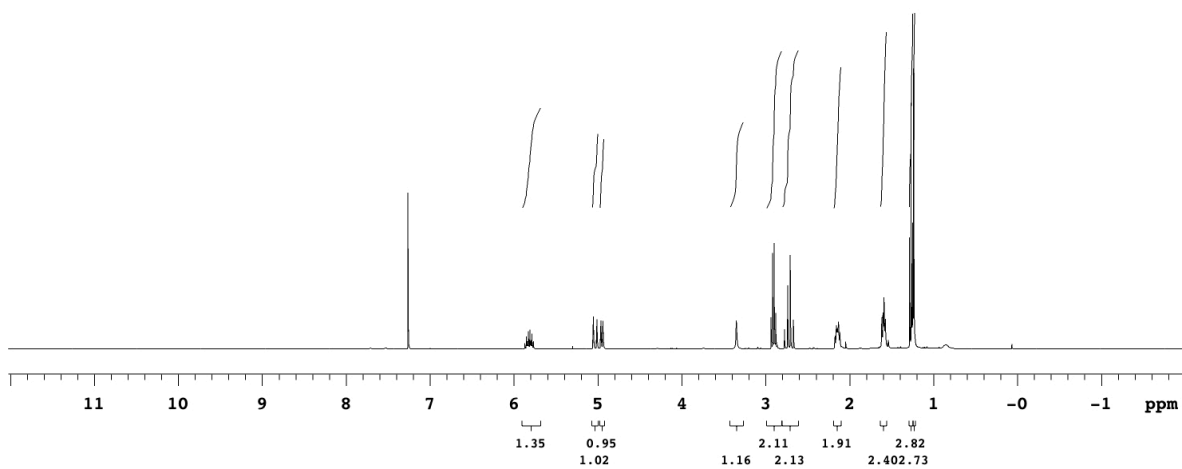



Archive directory:  
/export/home/arun/vnmrSYS/data  
Sample directory:

Pulse Sequence: s2pul  
Solvent: CDCl<sub>3</sub>

Relax. delay 3.000 sec  
Pulse 51.2 degrees  
Acq. time 4.002 sec  
Width 4997.5 Hz  
16 repetitions  
OBSERVE H1, 400.1115371 MHz  
DATA PROCESSING  
FT size 65536  
Total time 1 min

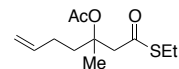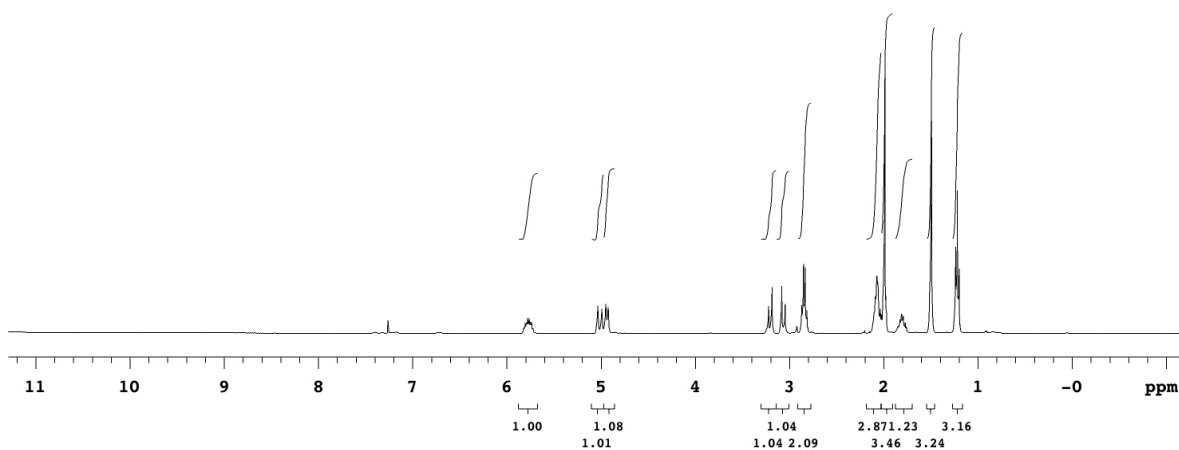

/export/home/arun/vnmrSYS/data  
Sample directory:

File: apt5-044-1H

Pulse Sequence: s2pul  
Solvent: CDCl<sub>3</sub>

Relax. delay 3.000 sec  
Pulse 51.2 degrees  
Acq. time 4.002 sec  
Width 4997.5 Hz  
16 repetitions  
OBSERVE H1, 400.1115372 MHz  
DATA PROCESSING  
FT size 65536  
Total time 1 min

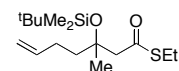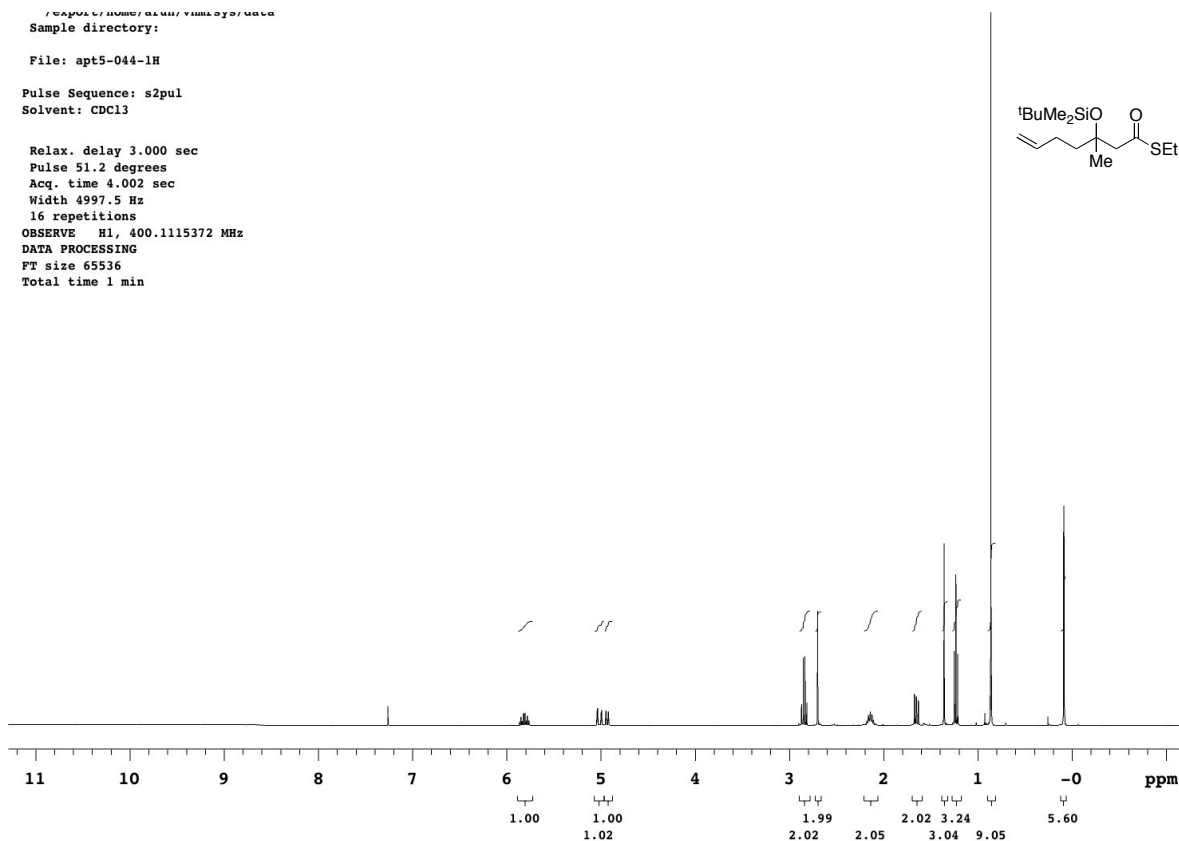

Archive directory:  
/export/home/arun/vnmrsys/data  
Sample directory:

File: apt5-265-1H

Pulse Sequence: s2pul  
Solvent: CDCl3

Relax. delay 3.000 sec  
Pulse 51.2 degrees  
Acq. time 4.002 sec  
Width 4997.5 Hz  
16 repetitions  
OBSERVE H1, 400.1115372 MHz  
DATA PROCESSING  
FT size 65536  
Total time 1 min

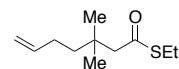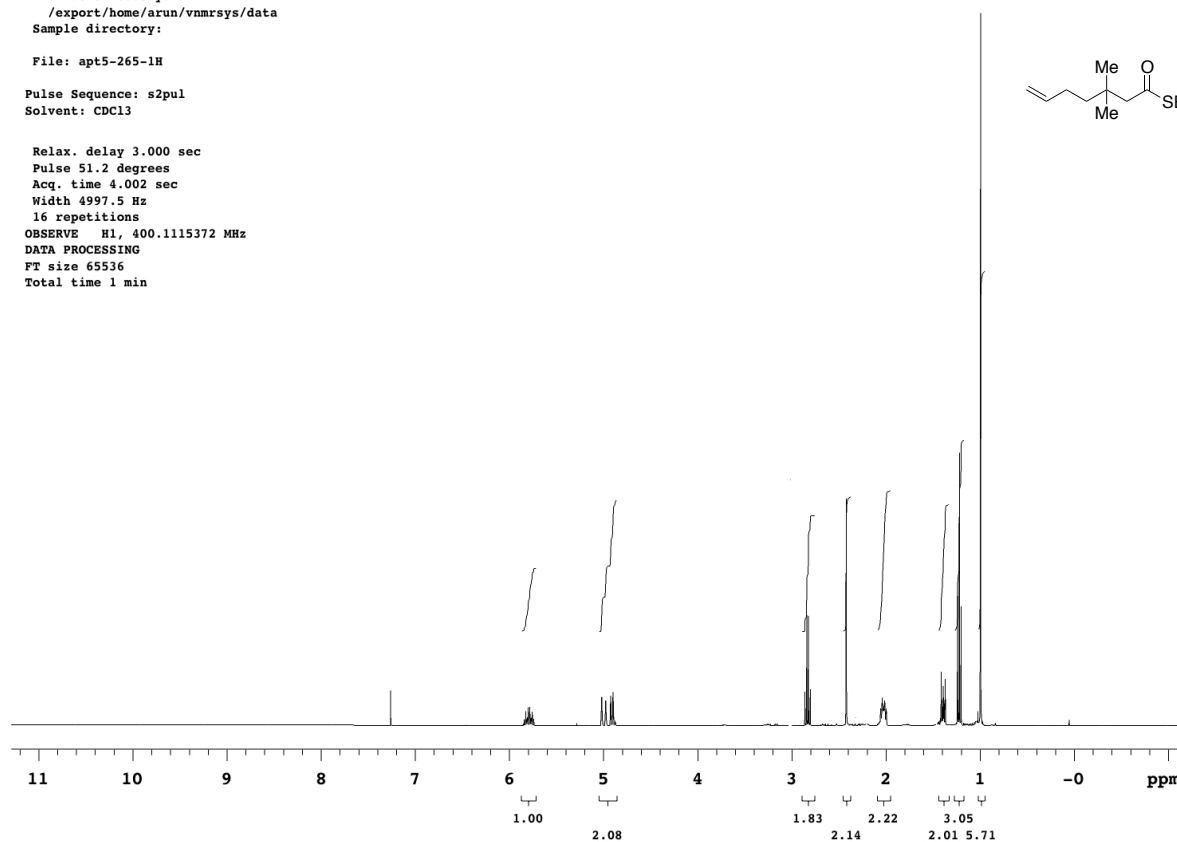

/export/home/arun/vnmrsys/data  
Sample directory:

Pulse Sequence: s2pul  
Solvent: CDCl3

Relax. delay 3.000 sec  
Pulse 51.2 degrees  
Acq. time 4.002 sec  
Width 4997.5 Hz  
16 repetitions  
OBSERVE H1, 400.1115366 MHz  
DATA PROCESSING  
FT size 65536  
Total time 1 min

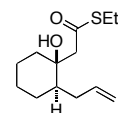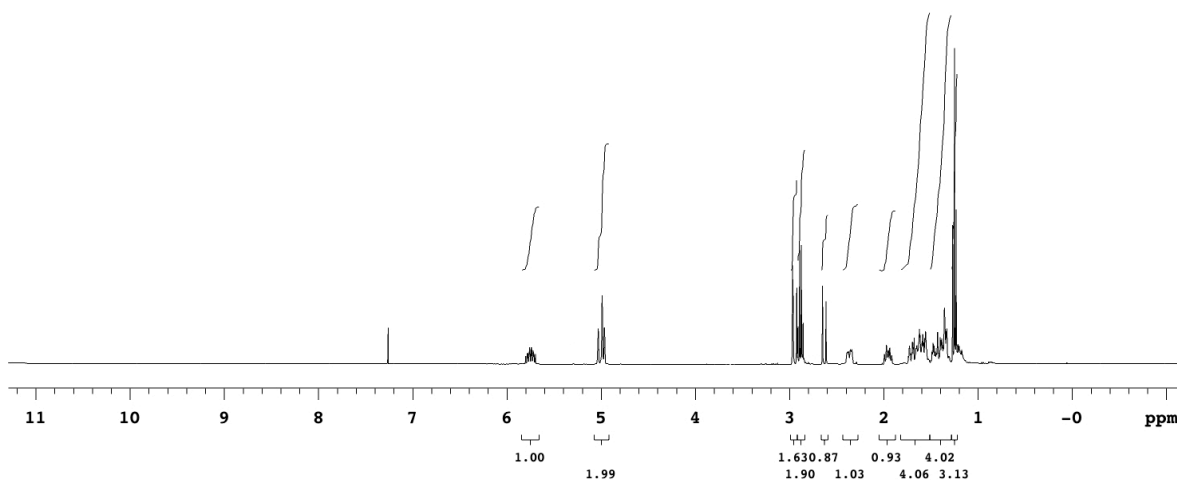

Archive directory:  
/export/home/arun/vnmrsys/data  
Sample directory:

Pulse Sequence: s2pul  
Solvent: CDCl<sub>3</sub>

Relax. delay 3.000 sec  
Pulse 51.2 degrees  
Acq. time 4.002 sec  
Width 4997.5 Hz  
16 repetitions  
OBSERVE H1, 400.1115372 MHz  
DATA PROCESSING  
FT size 65536  
Total time 1 min

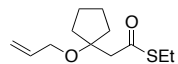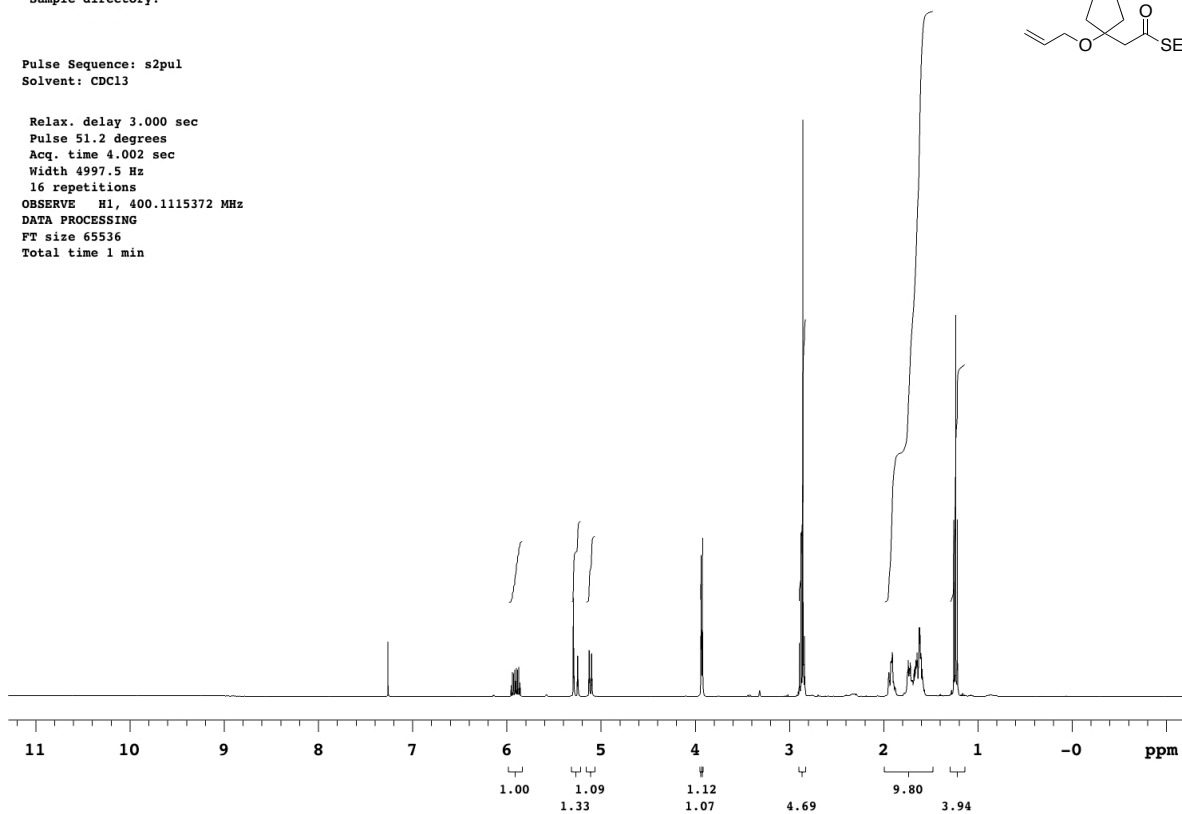

Archive directory:

Sample directory:

Pulse Sequence: s2pul  
Solvent: cdcl3  
Temp. 23.0 C / 296.1 K  
  
Relax. delay 3.000 sec  
Pulse 45.0 degrees  
Acq. time 4.000 sec  
Width 5605.4 Hz  
16 repetitions  
OBSERVE H1, 399.7291529 MHz  
DATA PROCESSING  
FT size 65536  
Total time 1 min

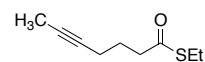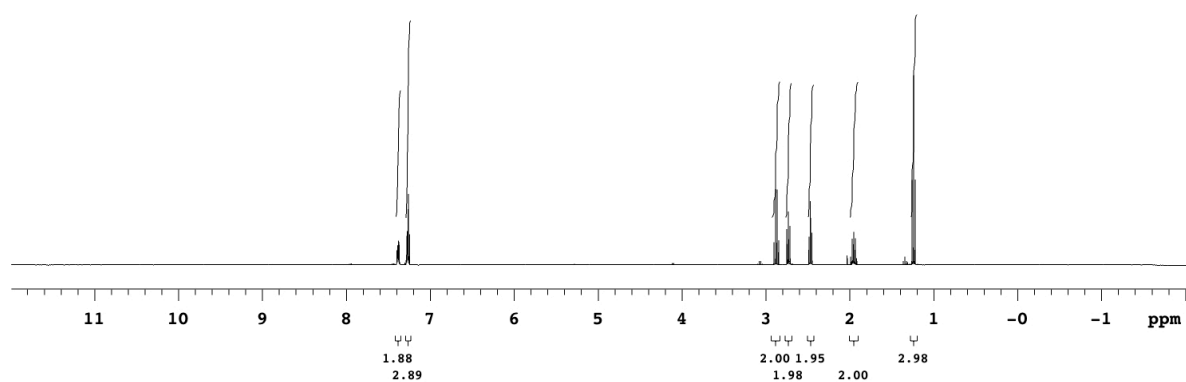

Archive directory:  
/export/home/arun/vnmrsys/data  
Sample directory:

Pulse Sequence: s2pul  
Solvent: CDCl3  
  
Relax. delay 0.500 sec  
Pulse 60.0 degrees  
Acq. time 4.002 sec  
Width 4997.5 Hz  
32 repetitions  
OBSERVE H1, 400.1115371 MHz  
DATA PROCESSING  
FT size 65536  
Total time 2 min

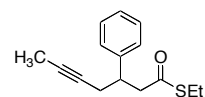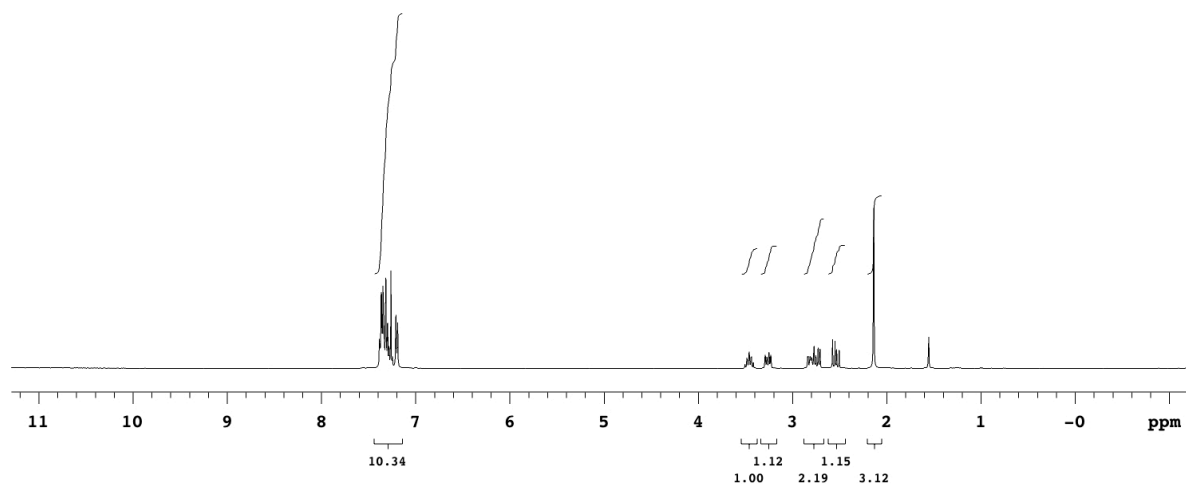

Archive directory:  
/export/home/arun/vnmrsys/data  
Sample directory:

Pulse Sequence: s2pul  
Solvent: CDCl<sub>3</sub>

Relax. delay 3.000 sec  
Pulse 52.1 degrees  
Acq. time 4.002 sec  
Width 4997.5 Hz  
16 repetitions  
OBSERVE H1, 400.1115375 MHz  
DATA PROCESSING  
FT size 65536  
Total time 1 min

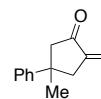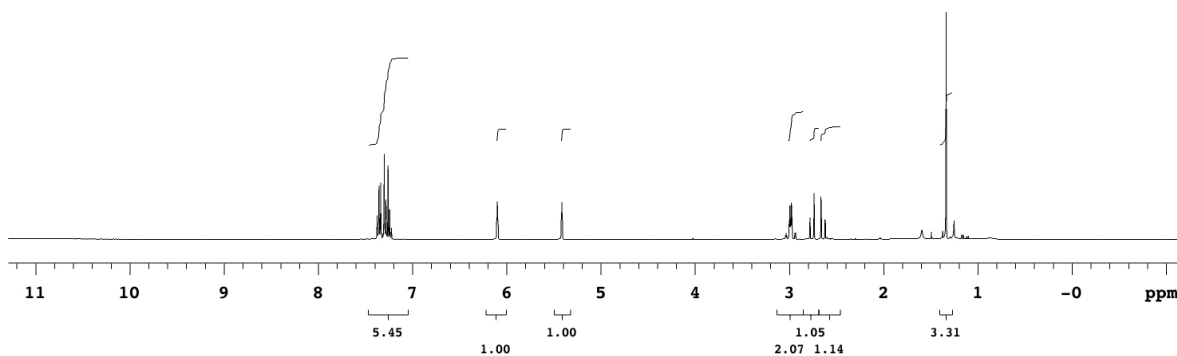

sample directory:

Pulse Sequence: s2pul

Relax. delay 3.000 sec  
Pulse 52.1 degrees  
Acq. time 4.002 sec  
Width 4997.5 Hz  
16 repetitions  
OBSERVE H1, 400.1115368 MHz  
DATA PROCESSING  
FT size 65536  
Total time 1 min

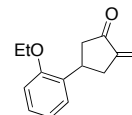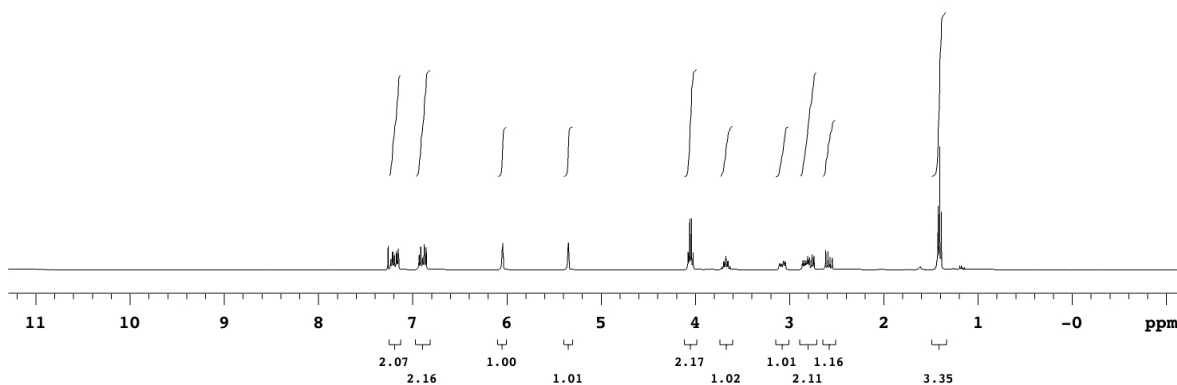

Archive directory:

1

File: apt3-122flashed

Pulse Sequence: s2pul  
Solvent: CDCl3

Relax. delay 3.000 sec  
Pulse 52.1 degrees  
Acq. time 4.002 sec  
Width 4997.5 Hz  
16 repetitions  
OBSERVE H1, 400.1115371 MHz  
DATA PROCESSING  
FT size 65536  
Total time 1 min

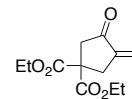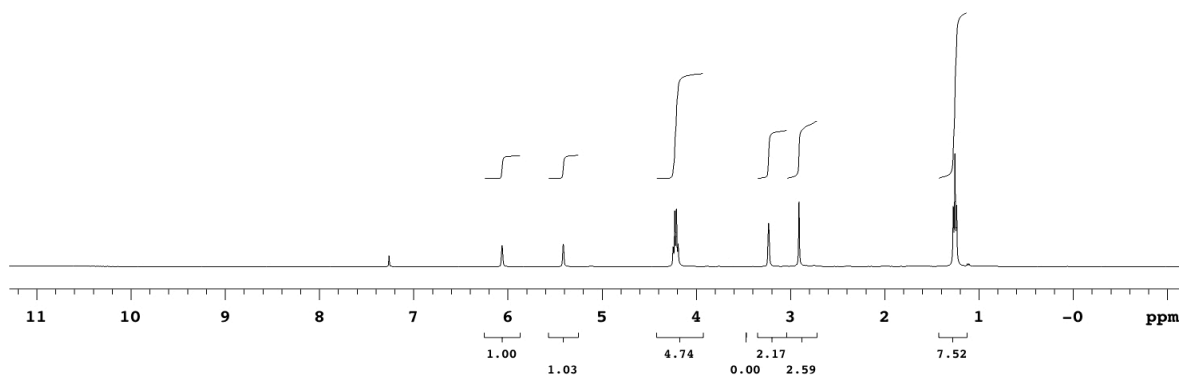

/export/home/arun/vnmrsys/data  
Sample directory:

Pulse Sequence: s2pul  
Solvent: CDCl3

Relax. delay 3.000 sec  
Pulse 52.1 degrees  
Acq. time 4.002 sec  
Width 4997.5 Hz  
12 repetitions  
OBSERVE H1, 400.1115371 MHz  
DATA PROCESSING  
FT size 65536  
Total time 1 min

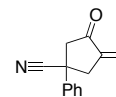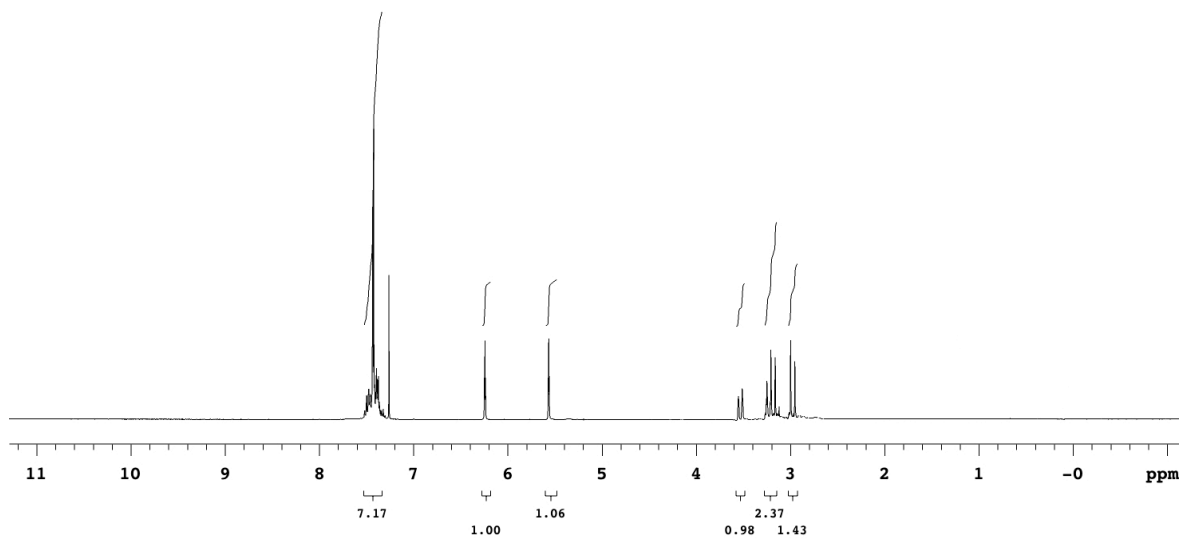

Archive directory:

-----

Pulse sequence: szpu1  
Solvent: cdcl3  
Temp. 22.0 C / 295.1 K  
Relax. delay 3.000 sec  
Pulse 45.0 degrees  
Acq. time 4.000 sec  
Width 5605.4 Hz  
16 repetitions  
OBSERVE H1, 399.7345513 MHz  
DATA PROCESSING  
FT size 65536  
Total time 1 min

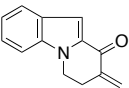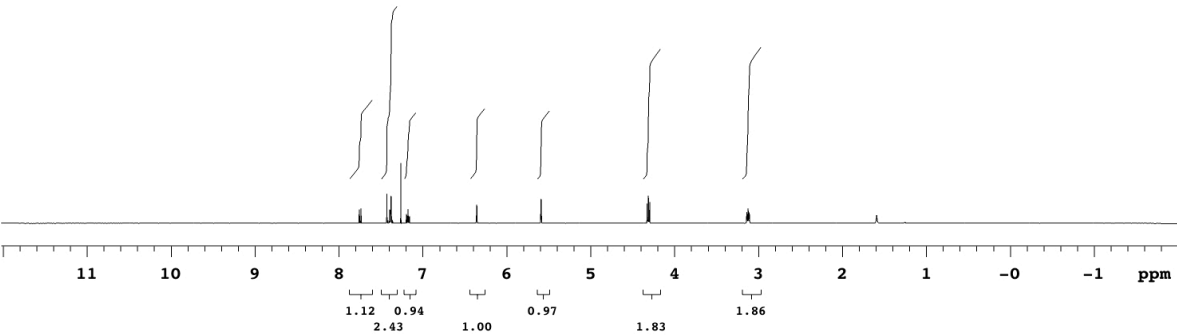

Archive directory:

-----

Temp. 22.0 C / 295.1 K  
Relax. delay 3.000 sec  
Pulse 45.0 degrees  
Acq. time 4.000 sec  
Width 5605.4 Hz  
16 repetitions  
OBSERVE H1, 399.7291446 MHz  
DATA PROCESSING  
FT size 65536  
Total time 1 min

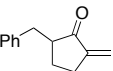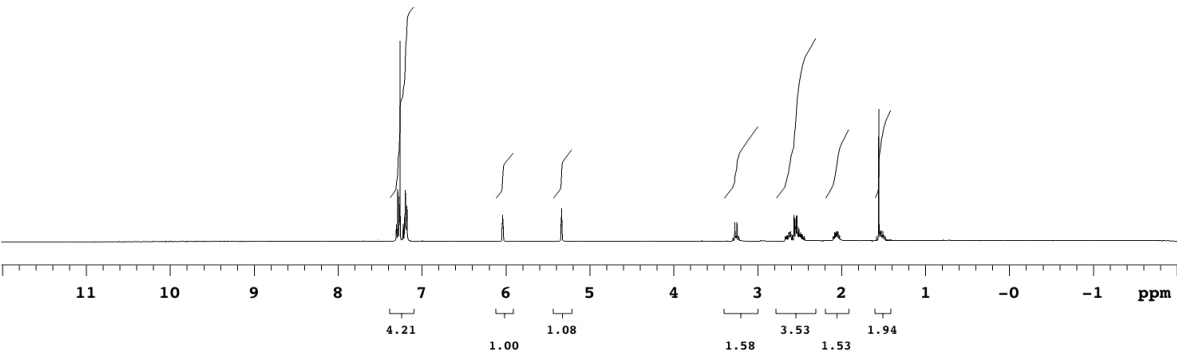



Archive directory:

File: apt3-224-for-charac

Pulse Sequence: s2pul  
Solvent: CDCl<sub>3</sub>

Relax. delay 3.000 sec  
Pulse 52.1 degrees  
Acq. time 4.002 sec  
Width 4997.5 Hz  
16 repetitions  
OBSERVE H1, 400.1115369 MHz  
DATA PROCESSING  
FT size 65536  
Total time 1 min

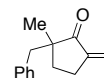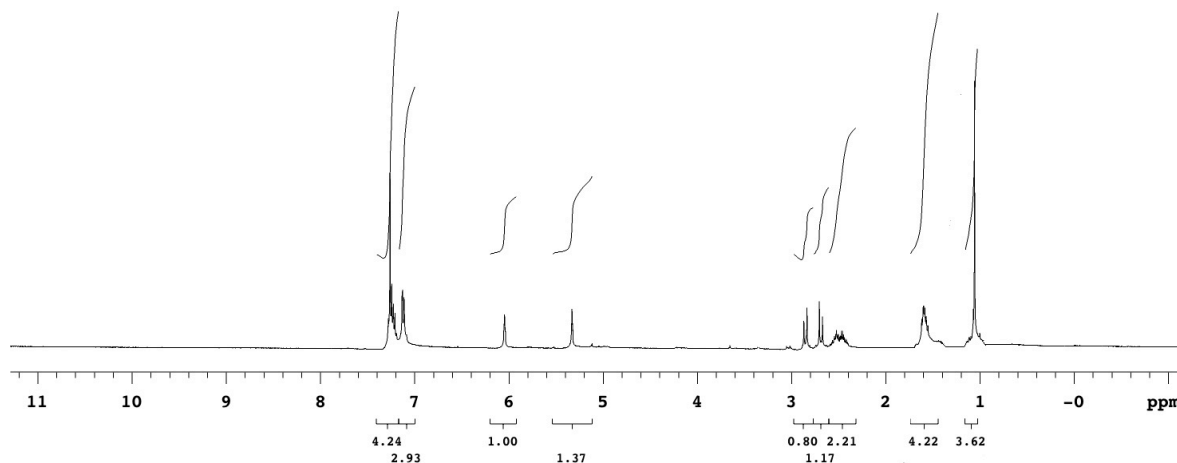

Sample directory:

File: apt5-095flashed

Pulse Sequence: s2pul  
Solvent: cdcl<sub>3</sub>  
Temp. 22.0 C / 295.1 K

Relax. delay 3.000 sec  
Pulse 45.0 degrees  
Acq. time 4.000 sec  
Width 5605.4 Hz  
16 repetitions  
OBSERVE H1, 399.7345505 MHz  
DATA PROCESSING  
FT size 65536  
Total time 1 min

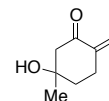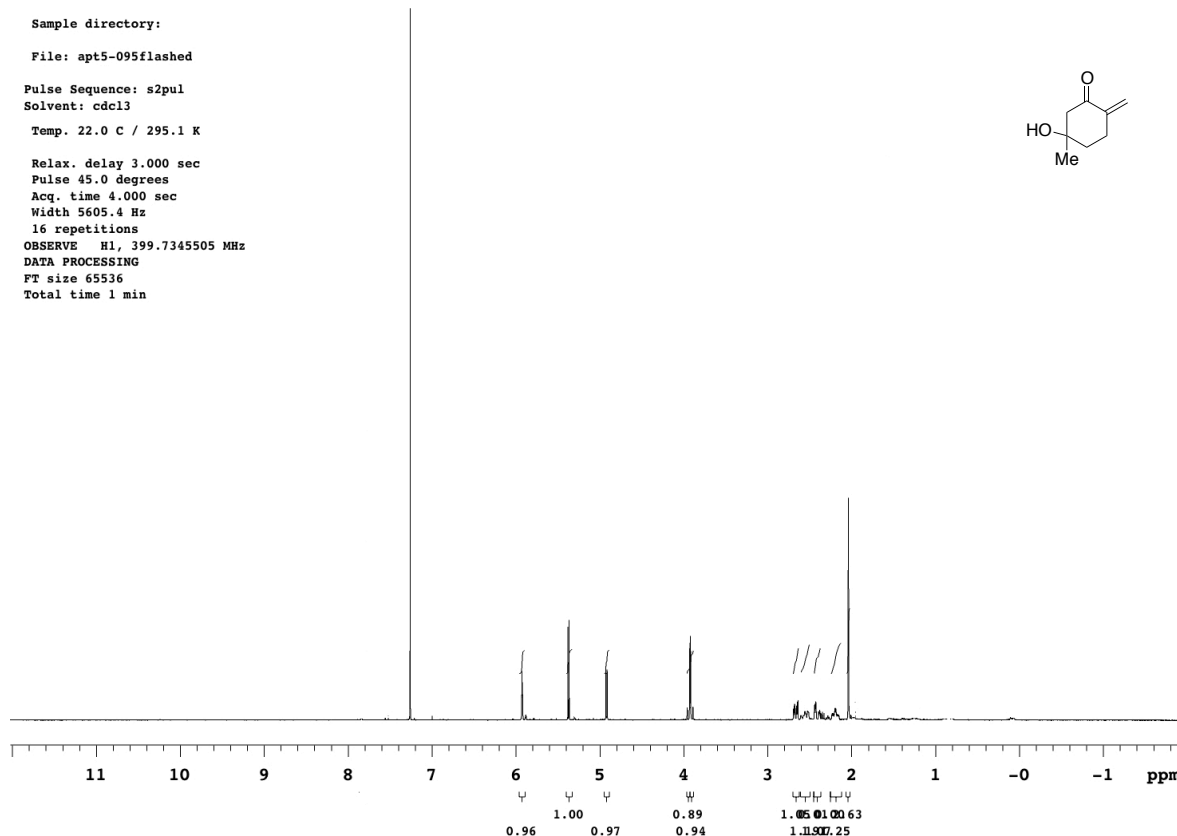

Archive directory:

Sample directory:

Pulse Sequence: s2pul  
Solvent: cdcl3  
Temp. 22.0 C / 295.1 K  
Relax. delay 3.000 sec  
Pulse 45.0 degrees  
Acq. time 4.000 sec  
Width 5605.4 Hz  
16 repetitions  
OBSERVE H1, 399.7345505 MHz  
DATA PROCESSING  
FT size 65536  
Total time 1 min

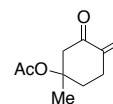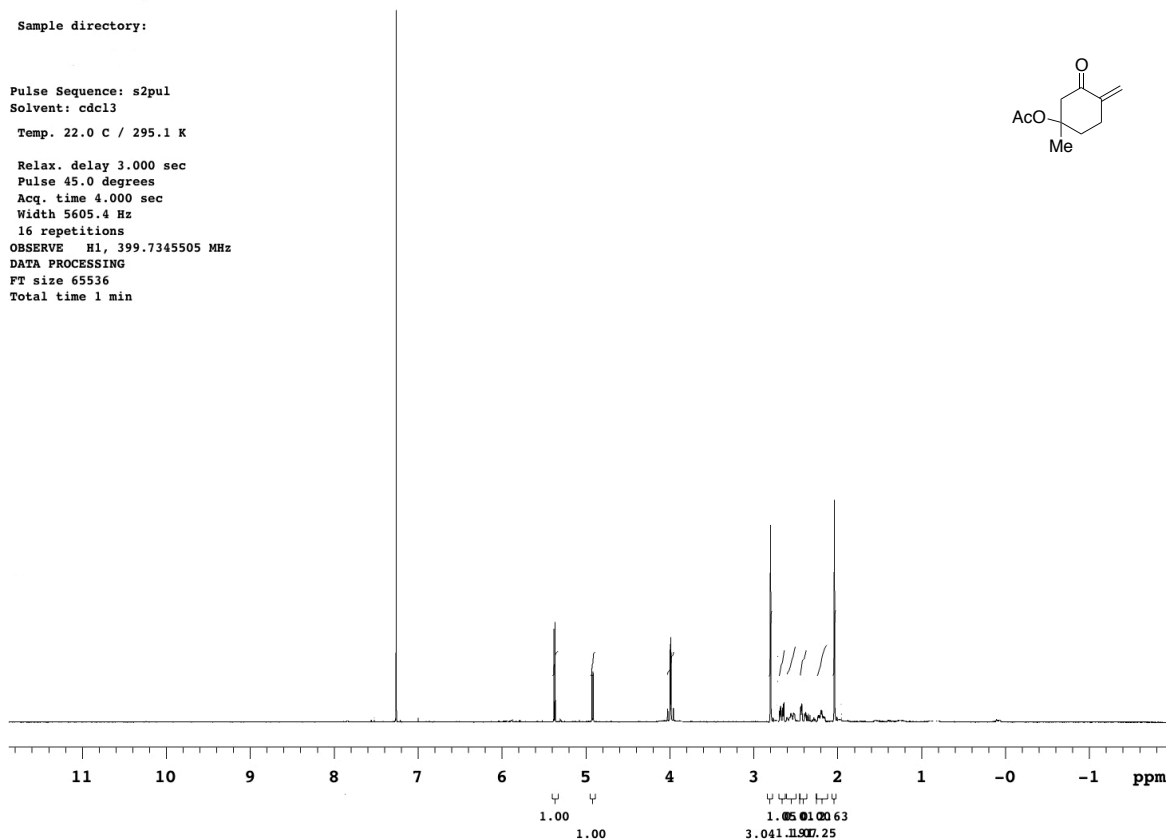

Sample directory:

Pulse Sequence: s2pul  
Solvent: cdcl3  
Temp. 22.0 C / 295.1 K  
Relax. delay 3.000 sec  
Pulse 45.0 degrees  
Acq. time 4.000 sec  
Width 5605.4 Hz  
16 repetitions  
BSERVE H1, 399.7345506 MHz  
ATA PROCESSING  
T size 65536  
Total time 1 min

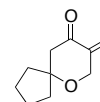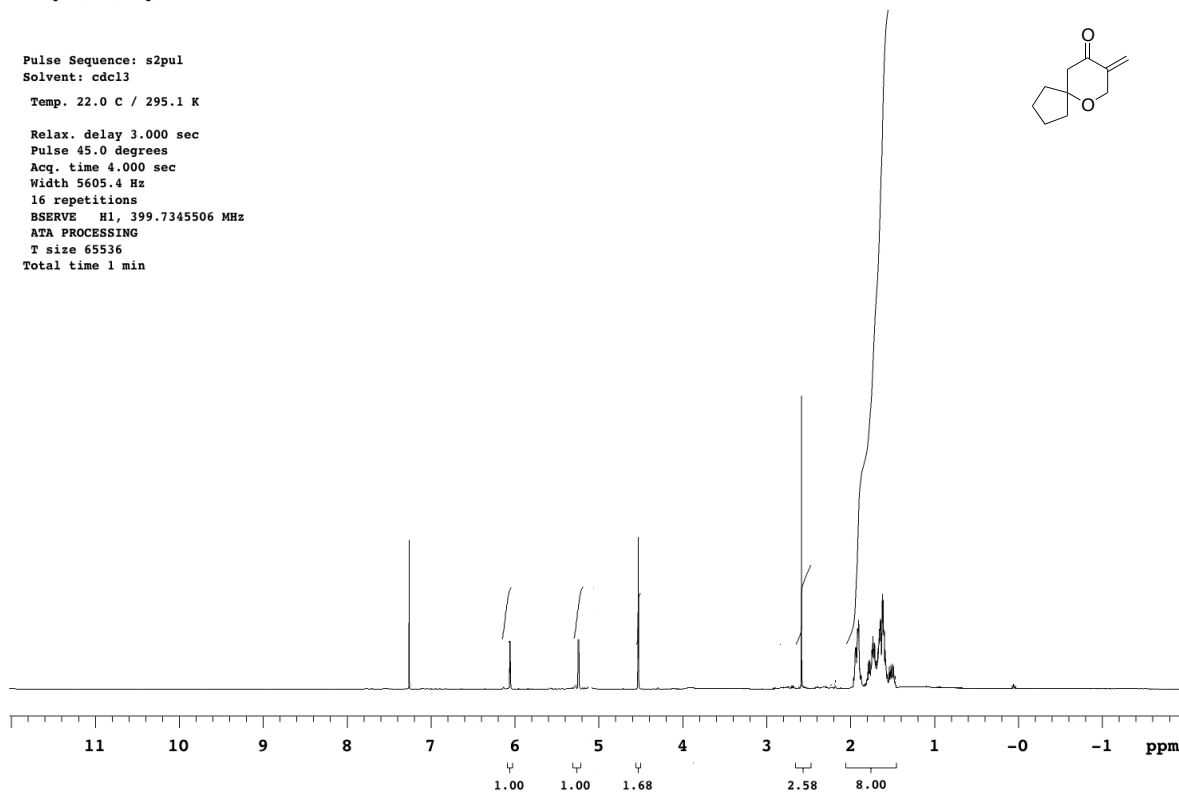

Archive directory:  
/export/home/arun/vnmrsys/data  
Sample directory:

Pulse Sequence: s2pul  
Solvent: CDCl3  
  
Relax. delay 3.000 sec  
Pulse 51.2 degrees  
Acq. time 4.002 sec  
Width 4997.5 Hz  
16 repetitions  
OBSERVE H1, 400.115366 MHz  
DATA PROCESSING  
FT size 65536  
Total time 1 min

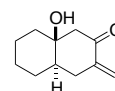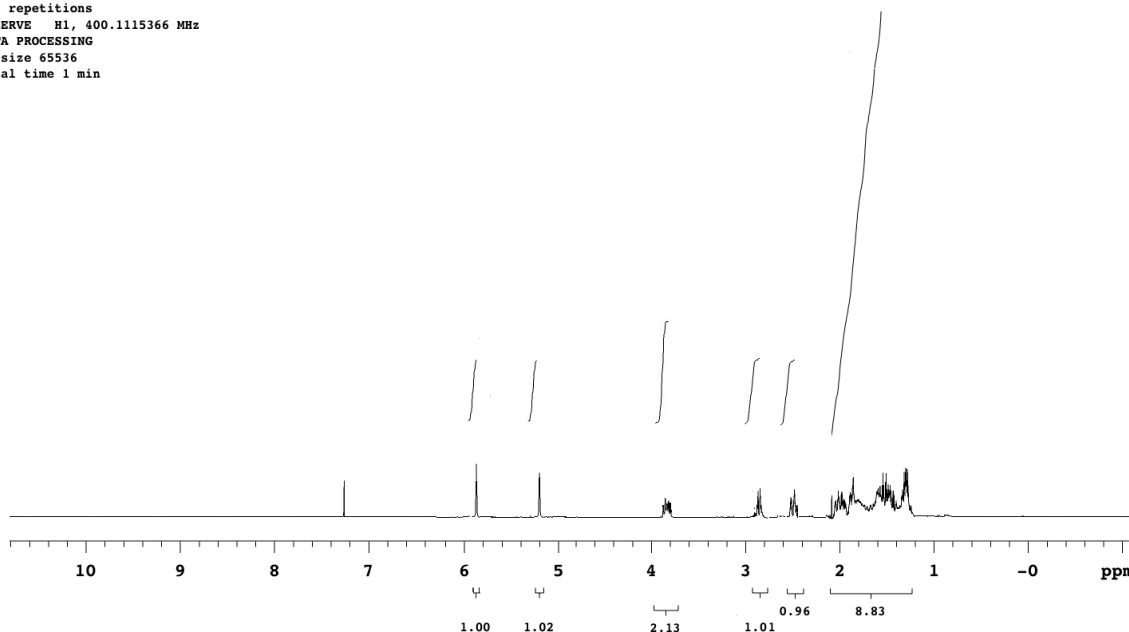

Archive directory:  
Sample directory:  
  
Pulse Sequence: s2pul  
Solvent: cdcl3  
Temp. 22.0 C / 295.1 K

Relax. delay 3.000 sec  
Pulse 45.0 degrees  
Acq. time 4.000 sec  
Width 5605.4 Hz  
16 repetitions  
OBSERVE H1, 399.7345515 MHz  
DATA PROCESSING  
FT size 65536  
Total time 1 min

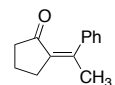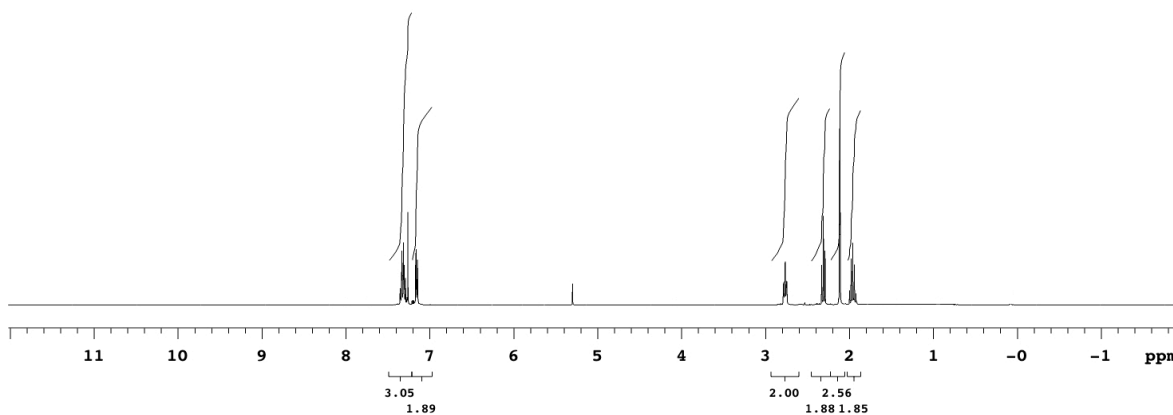

STANDARD 1H OBSERVE

Archive directory:  
/export/home/aron/vnmrsys/data  
Sample directory:  
  
File: TK2-236prod  
Pulse Sequence: s2pul  
Solvent: CDCl3

Relax. delay 0.500 sec  
Pulse 60.0 degrees  
Acq. time 4.002 sec  
Width 4997.5 Hz  
32 repetitions  
OBSERVE H1, 400.1115371 MHz  
DATA PROCESSING  
FT size 65536  
Total time 2 min

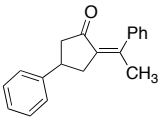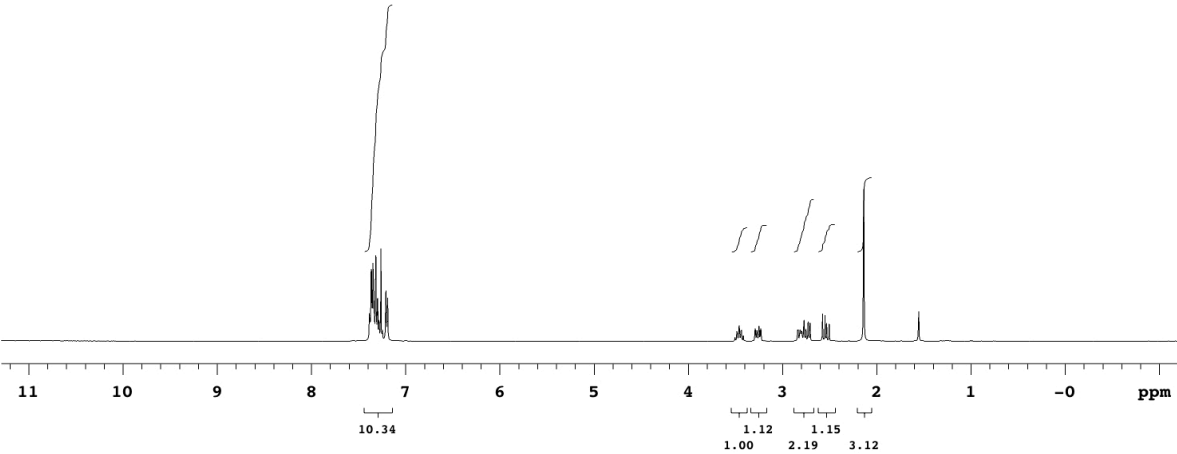

Supplement: c3sc50486g.pdf [file c3sc50486g.pdf]
